# Supplementary material for: Spatial transcriptome data from coronal mouse brain sections after striatal injection of heme and heme-hemopexin
Source: PubMed Central journal article supplement (PMC8814302; doi:10.1016/j.dib.2022.107866), 2022-01-22
Supplement: mmc1.pdf [file mmc1.pdf]

CG000239 Rev A

USER GUIDE

# Visium Spatial Gene Expression Reagent Kits

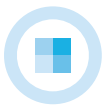

FOR USE WITH

Visium Spatial Gene Expression Slide & Reagent Kit, 16 rxns PN-1000184

Visium Spatial Gene Expression Slide & Reagent Kit, 4 rxns PN-1000187

Visium Accessory Kit, PN-1000194

Dual Index Kit TT Set A, 96 rxns PN-1000215

## Notices

### Document Number

CG000239 • Rev A

### Legal Notices

© 2019 10X Genomics, Inc (10x Genomics). All rights reserved. Duplication and/or reproduction of all or any portion of this document without the express written consent of 10x Genomics, is strictly forbidden. Nothing contained herein shall constitute any warranty, express or implied, as to the performance of any products described herein. Any and all warranties applicable to any products are set forth in the applicable terms and conditions of sale accompanying the purchase of such product. 10x Genomics provides no warranty and hereby disclaims any and all warranties as to the use of any third-party products or protocols described herein. The use of products described herein is subject to certain restrictions as set forth in the applicable terms and conditions of sale accompanying the purchase of such product. A non-exhaustive list of 10x Genomics' marks, many of which are registered in the United States and other countries can be viewed at: [www.10xgenomics.com/trademarks](http://www.10xgenomics.com/trademarks). 10x Genomics may refer to the products or services offered by other companies by their brand name or company name solely for clarity, and does not claim any rights in those third party marks or names. 10x Genomics products may be covered by one or more of the patents as indicated at: [www.10xgenomics.com/patents](http://www.10xgenomics.com/patents). The use of products described herein is subject to 10x Genomics Terms and Conditions of Sale, available at [www.10xgenomics.com/legal-notices](http://www.10xgenomics.com/legal-notices), or such other terms that have been agreed to in writing between 10x Genomics and user. All products and services described herein are intended FOR RESEARCH USE ONLY and NOT FOR USE IN DIAGNOSTIC PROCEDURES.

### Licensed Software Updates Warranties

Updates to existing Licensed Software may be required to enable customers to use new or existing products.

### Support

Email: [support@10xgenomics.com](mailto:support@10xgenomics.com)

10x Genomics

6230 Stoneridge Mall Road

Pleasanton, CA 94588 USA

---

Document  
Revision  
Summary

|                        |                                                             |
|------------------------|-------------------------------------------------------------|
| <b>Document Number</b> | CG000239                                                    |
| <b>Title</b>           | Visium Spatial Gene Expression Reagent Kits -<br>User Guide |
| <b>Revision</b>        | Rev A                                                       |
| <b>Revision Date</b>   | November 2019                                               |

- This is Rev A of the User Guide.

---

# Table of Contents

|                                             |    |
|---------------------------------------------|----|
| Introduction                                | 6  |
| Visium Spatial Gene Expression Reagent Kits | 7  |
| Visium Accessories                          | 9  |
| Recommended Thermal Cyclers                 | 9  |
| Recommended Real Time qPCR Systems          | 9  |
| Imaging System Recommendations              | 10 |
| Additional Kits, Reagents & Equipment       | 11 |
| Protocol Steps & Timing                     | 13 |
| Stepwise Objectives                         | 14 |
| Tips & Best Practices                       | 17 |
| Sample Preparation Guidelines               | 29 |
| Tissue Optimization Guidelines              | 31 |
| Step 1                                      | 33 |
| Tissue Staining & Imaging                   | 34 |
| 1.1 Tissue Fixation                         | 35 |
| 1.2 Tissue Staining                         | 36 |
| 1.3 Imaging                                 | 37 |
| Step 2                                      | 38 |
| Permeabilization & Reverse Transcription    | 39 |
| 2.1 Tissue Permeabilization                 | 40 |
| 2.2 Reverse Transcription                   | 41 |
| Step 3                                      | 42 |
| Second Strand Synthesis                     | 43 |
| 3.1 Second Strand Synthesis                 | 44 |
| 3.2 Denaturation                            | 45 |
| Step 4                                      | 46 |
| cDNA Amplification & QC                     | 47 |
| 4.1 Cycle Number Determination – qPCR       | 48 |
| 4.2 cDNA Amplification                      | 49 |
| 4.3 cDNA Cleanup – SPRIselect               | 50 |
| 4.4 cDNA QC & Quantification                | 51 |

---

|                                                                                         |    |
|-----------------------------------------------------------------------------------------|----|
| Step 5                                                                                  | 52 |
| Visium Spatial Gene Expression Library Construction                                     | 53 |
| 5.1 Fragmentation, End Repair & A-tailing                                               | 55 |
| 5.2 Post Fragmentation, End Repair & A-tailing Double Sided Size Selection – SPRIselect | 56 |
| 5.3 Adaptor Ligation                                                                    | 57 |
| 5.4 Post Ligation Cleanup – SPRIselect                                                  | 58 |
| 5.5 Sample Index PCR                                                                    | 59 |
| 5.6 Post Sample Index PCR Double Sided Size Selection – SPRIselect                      | 60 |
| 5.7 Post Library Construction QC                                                        | 61 |
| Sequencing                                                                              | 62 |
| Troubleshooting                                                                         | 65 |
| Appendix                                                                                | 69 |
| Post Library Construction Quantification                                                | 70 |
| Agilent TapeStation Traces                                                              | 71 |
| LabChip Traces                                                                          | 72 |
| Coverslip Application & Removal                                                         | 73 |
| Oligonucleotide Sequences                                                               | 74 |

# Introduction

[Visium Spatial Gene Expression Reagent Kits](#)

[Visium Accessories](#)

[Recommended Thermal Cyclers](#)

[Recommended Real Time qPCR Systems](#)

[Imaging System Recommendations](#)

[Additional Kits, Reagents & Equipment](#)

[Protocol Steps & Timing](#)

[Stepwise Objectives](#)

## Visium Spatial Gene Expression Reagent Kits

### Visium Spatial Gene Expression Slide & Reagent Kit, 16 rxns PN-1000184

#### Visium Spatial Gene Expression Reagent Kit, 16 rxns PN-1000186 (store at -20°C)

| Visium Spatial Gene Expression Reagent Kit |   |         |
|--------------------------------------------|---|---------|
|                                            | # | PN      |
| ● Permeabilization Enzyme                  | 1 | 2000214 |
| ● RT Reagent                               | 1 | 2000086 |
| ● RT Enzyme D                              | 1 | 2000216 |
| ● Template Switch Oligo                    | 2 | 3000228 |
| ○ Reducing Agent B                         | 1 | 2000087 |
| ● Second Strand Primer                     | 1 | 2000217 |
| ● Second Strand Enzyme                     | 1 | 2000218 |
| ● Second Strand Reagent                    | 1 | 2000219 |
| ● cDNA Primers                             | 1 | 2000089 |
| ○ Amp Mix                                  | 1 | 2000047 |

10xGenomics.com

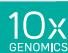

#### Library Construction Kit, 16 rxns PN-1000190 (store at -20°C)

| Library Construction Kit |   |         |
|--------------------------|---|---------|
|                          | # | PN      |
| ● Fragmentation Buffer   | 1 | 2000091 |
| ● Fragmentation Enzyme   | 1 | 2000090 |
| ● Ligation Buffer        | 1 | 2000092 |
| ● DNA Ligase             | 1 | 220110  |
| ● Adaptor Oligos         | 1 | 2000094 |
| ○ Amp Mix                | 1 | 2000047 |

10xGenomics.com

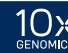

#### Visium Spatial Gene Expression Slide Kit, 16 rxns PN-1000185 (store at ambient temperature)

| Visium Spatial Gene Expression Slide Kit |    |         |
|------------------------------------------|----|---------|
|                                          | #  | PN      |
| Visium Spatial Gene Expression Slide     | 4  | 2000233 |
| Slide Seal                               | 20 | 3000279 |
| Slide Cassette                           | 4  | 3000406 |
| Slide Gasket                             | 4  | 3000426 |

10xGenomics.com

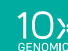

## Visium Spatial Gene Expression Reagent Kits

### Visium Spatial Gene Expression Slide & Reagent Kit, 4 rxns PN-1000187

#### Visium Spatial Gene Expression Reagent Kit, 4 rxns PN-1000189 (store at -20°C)

| Visium Spatial Gene Expression Reagent Kit |   |         |
|--------------------------------------------|---|---------|
|                                            | # | PN      |
| ● Permeabilization Enzyme                  | 1 | 2000214 |
| ● RT Reagent                               | 1 | 2000086 |
| ● RT Enzyme D                              | 1 | 2000227 |
| ● Template Switch Oligo                    | 1 | 3000228 |
| ○ Reducing Agent B                         | 1 | 2000087 |
| ● Second Strand Primer                     | 1 | 2000217 |
| ● Second Strand Enzyme                     | 1 | 2000183 |
| ● Second Strand Reagent                    | 1 | 2000219 |
| ● cDNA Primers                             | 1 | 2000089 |
| ○ Amp Mix                                  | 1 | 2000103 |

10xGenomics.com

10x  
GENOMICS

#### Library Construction Kit, 4 rxns PN-1000196 (store at -20°C)

| Library Construction Kit |   |         |
|--------------------------|---|---------|
|                          | # | PN      |
| ● Fragmentation Buffer   | 1 | 2000091 |
| ● Fragmentation Enzyme   | 1 | 2000104 |
| ● Ligation Buffer        | 1 | 2000092 |
| ● DNA Ligase             | 1 | 220131  |
| ● Adaptor Oligos         | 1 | 2000094 |

10xGenomics.com

10x  
GENOMICS

#### Visium Spatial Gene Expression Slide Kit, 4 rxns PN-1000188 (store at ambient temperature)

| Visium Spatial Gene Expression Slide Kit |   |         |
|------------------------------------------|---|---------|
|                                          | # | PN      |
| Visium Spatial Gene Expression Slide     | 1 | 2000233 |
| Slide Seals                              | 5 | 3000279 |
| Slide Cassette                           | 1 | 3000406 |
| Slide Gasket                             | 1 | 3000426 |

10xGenomics.com

10x  
GENOMICS



## Dual Index Kit TT Set A, 96 rxns PN-1000215 (store at -20°C)

## Dual Index Kit TT Set A

|                           | # | PN      |
|---------------------------|---|---------|
| Dual Index Plate TT Set A | 1 | 3000431 |

Visium  
Accessories

| Product                           | Part Number (Kit) | Part Number (Item) |
|-----------------------------------|-------------------|--------------------|
| Thermocycler Adaptor              |                   | 3000380            |
| Visium Spatial Imaging Test Slide | 1000194           | 2000235            |
| 10x Magnetic Separator            |                   | 230003             |
| Slide Alignment Tool              |                   | 3000433            |

Recommended  
Thermal Cyclers

| Supplier                 | Description                                                  | Part Number                                           |
|--------------------------|--------------------------------------------------------------|-------------------------------------------------------|
| Bio-Rad                  | C1000 Touch Thermal Cycler with 96-Deep Well Reaction Module | 1851197                                               |
| Eppendorf                | MasterCycler Pro                                             | North America 950030010<br>International 6321 000.019 |
| Thermo Fisher Scientific | Veriti 96-Well Thermal Cycler                                | 4375786                                               |

Recommended  
Real Time qPCR  
Systems

| Supplier           | Description                 | Part Number |
|--------------------|-----------------------------|-------------|
| Applied Biosystems | QuantStudio 12K Flex system | 4471087     |
| Bio-Rad            | CFX96 Real-time System      | 1855096     |

## Imaging System Recommendations

The imaging systems listed below were used by 10x Genomics. Any equivalent system with the listed features may be used for imaging. Hardware compatibility may be tested by using the Visium Spatial Imaging Test Slide.

| Imaging Systems & Specifications                                                                                |                                                                                                                                                                                                                                                                                                                             |
|-----------------------------------------------------------------------------------------------------------------|-----------------------------------------------------------------------------------------------------------------------------------------------------------------------------------------------------------------------------------------------------------------------------------------------------------------------------|
| <b>Microscopes</b><br>(Any equivalent system with the listed features may be used for imaging)                  |                                                                                                                                                                                                                                                                                                                             |
| Nikon                                                                                                           | Nikon Eclipse Ti2 with brightfield and fluorescence capacity (TRITC)                                                                                                                                                                                                                                                        |
| Molecular Devices                                                                                               | ImageXpress Nano Automated Slide Imaging System                                                                                                                                                                                                                                                                             |
| Microscope Features                                                                                             |                                                                                                                                                                                                                                                                                                                             |
| Objectives                                                                                                      | <ul style="list-style-type: none"> <li>• 4X (Plan APO <math>\lambda</math>; NA 0.20)</li> <li>• 10X (Plan APO <math>\lambda</math>; NA 0.45)</li> <li>• 20X (Plan APO <math>\lambda</math>; NA 0.75)</li> </ul>                                                                                                             |
| Scanning Stage                                                                                                  | Microscope tile scanning functionality is required for imaging tissue sections placed on a Capture Area of a Visium Spatial slide.                                                                                                                                                                                          |
| Brightfield Features                                                                                            | <ul style="list-style-type: none"> <li>• Color camera (3 x 8 bit, 2424 x 2424 pixel resolution)</li> <li>• White balancing functionality</li> <li>• Minimum Capture Resolution 2.18 <math>\mu\text{m}/\text{pixel}</math></li> <li>• Exposure times 2-10 milli sec</li> </ul>                                               |
| Fluorescence Features*                                                                                          | <ul style="list-style-type: none"> <li>• Light source (or equivalent) with a wavelength range of 380-680 nm</li> <li>• Monochrome camera (14 bit, 2,424 x 2,424 pixel resolution)</li> <li>• Minimum Capture Resolution 2.18 <math>\mu\text{m}/\text{pixel}</math></li> <li>• Exposure times 100 milli sec-2 sec</li> </ul> |
| *Only required for Visium Spatial Tissue Optimization protocol & Visium Spatial Imaging Test Slide verification |                                                                                                                                                                                                                                                                                                                             |
| Additional Specifications                                                                                       |                                                                                                                                                                                                                                                                                                                             |
| Image Format                                                                                                    | Save image in tiff (preferred) or jpeg format.                                                                                                                                                                                                                                                                              |
| Computer                                                                                                        | Computer with sufficient power to handle large images (0.5-5 GB)                                                                                                                                                                                                                                                            |
| Software                                                                                                        | Image stitching software<br>(microscope's software or equivalent, like Image J)                                                                                                                                                                                                                                             |

### Image Capture Guidelines:

The 8 mm x 8 mm area that includes the fiducial frame and the Capture Area with the tissue section should be represented by  $\geq 2,000 \times 2,000$  pixel portion of the image. When setting the microscope for imaging individual Capture Area, the imaging area should be ~1-2 mm beyond the fiducial frame for optimal imaging alignment. Minimize imaging of any adjacent Capture Area/s when taking images of a specific Capture Area with a tissue section. For lossy compression, such as jpeg, the quality level should be kept high enough to represent the fiducial frame crisply and without artifact.

## Additional Kits, Reagents & Equipment

The items in the table below have been validated by 10x Genomics and are highly recommended for the Visium Spatial Reagent Kits protocol. Substituting materials may adversely affect system performance. This list does not include standard laboratory equipment such as water baths, centrifuges, vortex mixers, pH meters, freezers etc.

| Supplier                   | Description                                                                                                                                                                                                                                          | Part Number (US)                                                                       |
|----------------------------|------------------------------------------------------------------------------------------------------------------------------------------------------------------------------------------------------------------------------------------------------|----------------------------------------------------------------------------------------|
| <b>Plastics</b>            |                                                                                                                                                                                                                                                      |                                                                                        |
| Eppendorf                  | PCR Tubes 0.2 ml 8-tube strips<br>DNA LoBind Tubes, 1.5 ml<br>DNA LoBind Tubes, 2.0 ml (when processing more than 2 slides)                                                                                                                          | 951010022<br>022431021<br>022431048                                                    |
| USA Scientific             | TempAssure PCR 8-tube strip                                                                                                                                                                                                                          | 1402-4700                                                                              |
| Thermo Fisher Scientific   | MicroAmp 8-Tube Strip, 0.2 ml<br>MicroAmp 8 -Cap Strip, clear<br>Simport Scientific LockMailer Tamper Evidence Slide Mailer<br>(alternatively, use a 50-ml centrifuge tube)                                                                          | N8010580<br>N8010535<br>22-038-399                                                     |
| Corning                    | Self-Standing Polypropylene Centrifuge Tubes (50 ml), sterile<br>Corning 250 mL Vacuum System, 0.2 µm Pore 19.6cm <sup>2</sup> NY Membrane                                                                                                           | 430921<br>430771                                                                       |
| Bio-Rad                    | Hard-shell PCR Plates 96-well, thin wall (pkg of 50)<br>(alternatively, use any compatible PCR Plate)<br>Microseal 'B' PCR Plate Sealing Film, adhesive<br>(alternatively, use any PCR Plate sealing adhesive)                                       | HSP9665<br>MSB1001                                                                     |
| Rainin                     | Tips LTS 200UL Filter RT-L200FLR<br>Tips LTS 1ML Filter RT-L1000FLR<br>Tips LTS 20UL Filter RT-L10FLR                                                                                                                                                | 30389240<br>30389213<br>30389226                                                       |
| VWR                        | Divided Polystyrene Reservoirs                                                                                                                                                                                                                       | 41428-958                                                                              |
| <b>Kits &amp; Reagents</b> |                                                                                                                                                                                                                                                      |                                                                                        |
| Agilent                    | Hematoxylin, Mayer's (Lillie's Modification)<br>(alternatively, Mayer's Hematoxylin from Electron Microscopy Services,<br>2638102 may be used)<br>Bluing Buffer, Dako                                                                                | S330930-2<br>CS70230-2                                                                 |
| Thermo Fisher Scientific   | Nuclease-free Water<br>Low TE Buffer (10 mM Tris-HCl pH 8.0, 0.1 mM EDTA)<br>Tris Base (White Crystals or Crystalline Powder/Molecular Biology)<br>Tris 1M, pH 7.0, RNase-free                                                                       | AM9937<br>12090-015<br>BP152-500<br>AM9850G                                            |
| Fisher Chemical            | Hydrochloric Acid Solution, 0.1N                                                                                                                                                                                                                     | SA54-1                                                                                 |
| KAPA Biosystems            | KAPA SYBR FAST qPCR Master Mix (2X)                                                                                                                                                                                                                  | KK4600                                                                                 |
| Millipore Sigma            | Ethanol, Pure (200 Proof, anhydrous)<br>Potassium Hydroxide Solution, 8M<br>Methanol, for HPLC, ≥ 99.9%<br>2-Propanol (Isopropanol), ≥ 99.5%<br>SSC Buffer 20X Concentrate<br>Eosin Y solution, aqueous, 0.5% (w/v) in water<br>Acetic acid, ≥ 99.9% | E7023-500ML<br>P4494-50ML<br>34860<br>I9516-25ML<br>S66391L<br>HT110216-500ML<br>A6283 |
| Beckman Coulter            | SPRIselect Reagent Kit                                                                                                                                                                                                                               | B23318                                                                                 |
| Qiagen                     | Qiagen Buffer EB                                                                                                                                                                                                                                     | 19086                                                                                  |
| -                          | Ultrapure/Milli-Q water (from Milli-Q Integral Ultrapure Water System or equivalent)                                                                                                                                                                 |                                                                                        |

## Additional Kits, Reagents & Equipment

The items in the table below have been validated by 10x Genomics and are highly recommended for the Visium Spatial Reagent Kits protocol. Substituting materials may adversely affect system performance. This list does not include standard laboratory equipment such as water baths, centrifuges, vortex mixers, pH meters, freezers etc.

| Supplier                                    | Description                                                                              | Part Number (US)                             |
|---------------------------------------------|------------------------------------------------------------------------------------------|----------------------------------------------|
| <b>Equipment</b>                            |                                                                                          |                                              |
| Rainin                                      | Pipet-Lite Multi Pipette L8-200XLS+                                                      | 17013805                                     |
|                                             | Pipet-Lite LTS Pipette L-2XLS+                                                           | 17014393                                     |
|                                             | Pipet-Lite LTS Pipette L-10XLS+                                                          | 17014388                                     |
|                                             | Pipet-Lite LTS Pipette L-20XLS+                                                          | 17014392                                     |
|                                             | Pipet-Lite LTS Pipette L-100XLS+                                                         | 17014384                                     |
|                                             | Pipet-Lite LTS Pipette L-200XLS+                                                         | 17014391                                     |
|                                             | Pipet-Lite LTS Pipette L-1000XLS+                                                        | 17014382                                     |
| Thermo Fisher Scientific                    | MYFUGE 12 Mini Centrifuge<br>(alternatively, use any equivalent mini centrifuge)         | C1012                                        |
| <b>Quantification &amp; Quality Control</b> |                                                                                          |                                              |
| Agilent                                     | 2100 Bioanalyzer Laptop Bundle                                                           | G2943CA                                      |
|                                             | High Sensitivity DNA Kit                                                                 | 5067-4626                                    |
|                                             | 4200 TapeStation                                                                         | G2991AA                                      |
|                                             | High Sensitivity D1000 ScreenTape/Reagents<br>High Sensitivity D5000 ScreenTape/Reagents | 5067-5592/ 5067-5593<br>5067-5584/ 5067-5585 |
| PerkinElmer                                 | LabChip GX Touch HT Nucleic Acid Analyzer<br>DNA High Sensitivity Reagent Kit            | CLS137031<br>CLS760672                       |
| Advanced Analytical                         | Fragment Analyzer Automated CE System - 12 cap                                           | FSv2-CE2F                                    |
|                                             | Fragment Analyzer Automated CE System - 48/96 cap                                        | FSv2-CE10F                                   |
|                                             | High Sensitivity NGS Fragment Analysis Kit                                               | DNF-474                                      |
| KAPA Biosystems                             | KAPA Library Quantification Kit for Illumina Platforms                                   | KK4824                                       |

Choose Bioanalyzer, TapeStation, Lab Chip or Fragment Analyzer based on availability & preference.

## Protocol Steps & Timing

8 h\*

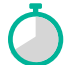

| Steps                                                                                   | Timing    | Stop & Store                 |
|-----------------------------------------------------------------------------------------|-----------|------------------------------|
| <b>Step 1 – Tissue Staining &amp; Imaging</b>                                           |           |                              |
| 1.1 Tissue Fixation                                                                     | 35 min    |                              |
| 1.2 Tissue Staining                                                                     | 30 min    |                              |
| 1.3 Tissue Imaging*                                                                     | Variable  |                              |
| <b>Step 2 – cDNA Synthesis</b>                                                          |           |                              |
| 2.1 Tissue Permeabilization                                                             | Variable  |                              |
| 2.2 Reverse Transcription                                                               | 65 min    |                              |
| <b>Step 3 – Second Strand Synthesis &amp; Denaturation</b>                              |           |                              |
| 3.1 Second Strand Synthesis                                                             | 25 min    |                              |
| 3.2 cDNA Denaturation                                                                   | 15 min    |                              |
| <b>Step 4 – cDNA Amplification &amp; QC</b>                                             |           |                              |
| 4.1 Cycle Number Determination – qPCR                                                   | 45 min    |                              |
| 4.2 cDNA Amplification                                                                  | 45-60 min | 4°C ≤72 h or -20°C ≤1 week   |
| 4.3 cDNA Cleanup – SPRIselect                                                           | 20 min    | 4°C ≤72 h -20°C ≤4 weeks     |
| 4.4 cDNA QC & Quantification*                                                           | 50 min    |                              |
| <b>Step 5 – Visium Spatial Gene Expression Library Construction</b>                     |           |                              |
| 5.1 Fragmentation, End Repair & A-tailing                                               | 50 min    |                              |
| 5.2 Post Fragmentation, End Repair & A-tailing Double Sided Size Selection – SPRIselect | 30 min    |                              |
| 5.3 Adaptor Ligation                                                                    | 25 min    |                              |
| 5.4 Post Ligation Cleanup- SPRIselect                                                   | 20 min    |                              |
| 5.5 Sample Index PCR                                                                    | 40 min    | 4°C ≤72 h                    |
| 5.6 Post Sample Index PCR Double Sided Size Selection- SPRIselect                       | 30 min    | 4°C ≤72 h or -20°C long term |
| 5.7 Post Library Construction QC*                                                       | 50 min    |                              |

\*~8 h workflow, excluding imaging & QC steps

## Stepwise Objectives

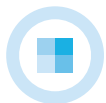

The Visium Spatial Gene Expression Solution measures total mRNA in intact tissue sections and maps the location(s) where gene activity is occurring. Each Visium Spatial Gene Expression Slide contains Capture Areas with gene expression spots that include primers required for capture and priming of poly-adenylated mRNA. Tissue sections placed on these Capture Areas are permeabilized and cellular mRNA is captured by the primers on the gene expression spots. All the cDNA generated from mRNA captured by primers on a specific spot share a common Spatial Barcode. Libraries are generated from the cDNA and sequenced and the Spatial Barcodes are used to associate the reads back to the tissue section images for spatial gene expression mapping.

This document outlines the protocol for generating Visium Spatial Single Cell 3' Gene Expression libraries from tissue sections placed on the Capture Areas of a Visium Spatial Gene Expression Slide.

## Visium Spatial Gene Expression Slide

The Visium Spatial Gene Expression Slide includes 4 Capture Areas (6.5 x 6.5 mm), each defined by a fiducial frame (fiducial frame + Capture Area is 8 x 8 mm). The Capture Area has ~5,000 gene expression spots, each spot with primers that include:

- Illumina TruSeq Read 1 (partial read 1 sequencing primer)
- 16 nt Spatial Barcode (all primers in a specific spot share the same Spatial Barcode)
- 12 nt unique molecular identifier (UMI)
- 30 nt poly(dT) sequence (captures poly-adenylated mRNA for cDNA synthesis).

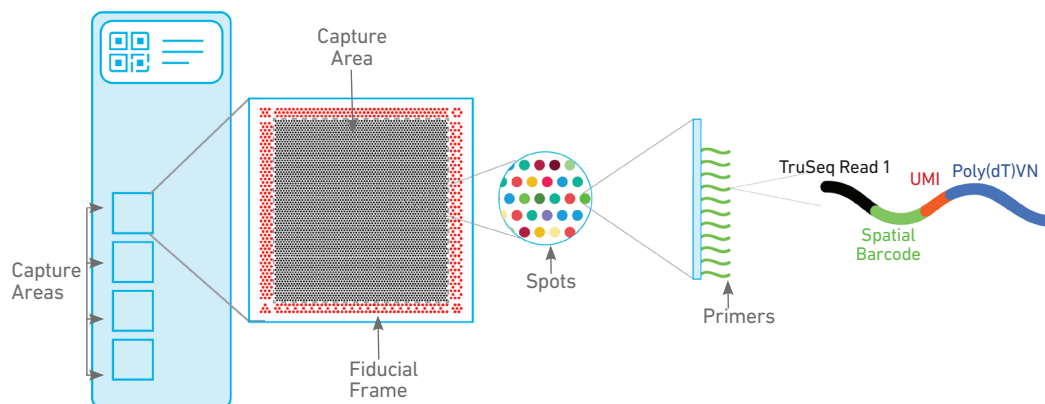

## Step 1 Tissue Staining & Imaging

Tissue sections on the Capture Areas of the Visium Spatial Gene Expression are fixed using methanol. Hematoxylin is used to stain the nuclei, followed by eosin staining for the extracellular matrix and cytoplasm. The stained tissue sections are imaged. The images will be used downstream to map the gene expression patterns back to the tissue sections.

### Staining & Imaging

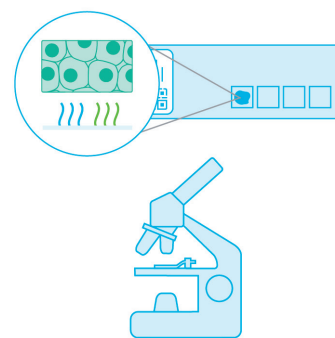

### Step 2 Permeabilization & Reverse Transcription

A Permeabilization Enzyme is used to permeabilize the tissue sections on the slide. The polyadenylated mRNA released from the overlying cells is captured by the primers on the spots. RT Master Mix containing reverse transcription reagents is added to the permeabilized tissue sections. Incubation with the reagents produces spatially barcoded, full-length cDNA from polyadenylated mRNA on the slide.

#### Permeabilization

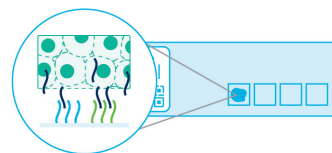

#### Reactions on slide Capture Areas

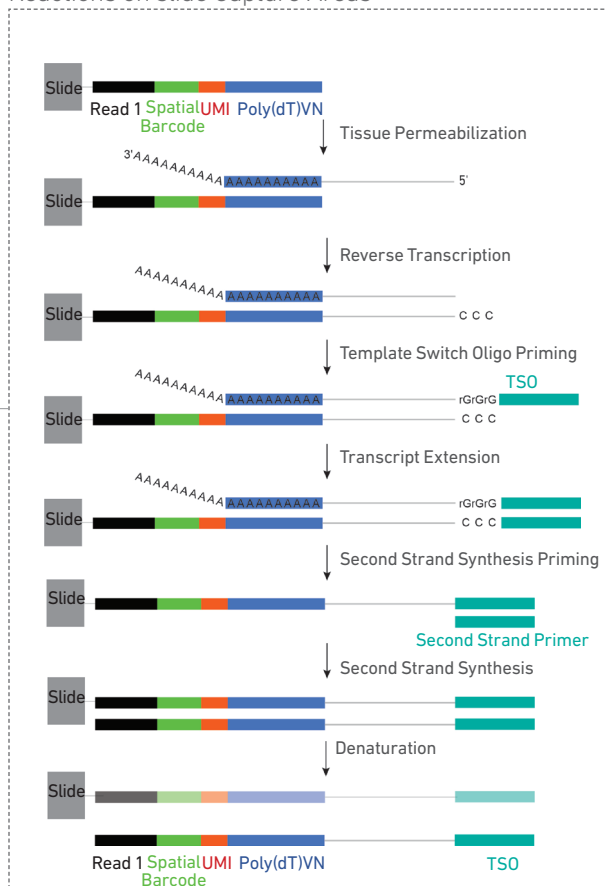

### Step 3 Second Strand Synthesis & Denaturation

Second Strand Mix is added to the tissue sections on the slide to initiate second strand synthesis. This is followed by denaturation and transfer of the cDNA from each Capture Area to a corresponding tube for amplification and library construction.

### Step 4 cDNA Amplification & QC

After transfer of cDNA from the slide, spatially barcoded, full-length cDNA is amplified via PCR to generate sufficient mass for library construction.

#### cDNA amplification

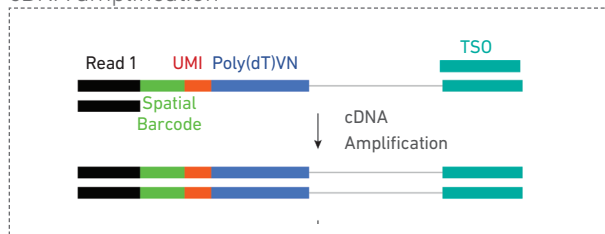

## Step 5 Visium Spatial Gene Expression Library Construction

Enzymatic fragmentation and size selection are used to optimize the cDNA amplicon size. P5, P7, i7 and i5 sample indexes, and TruSeq Read 2 (read 2 primer sequence) are added via End Repair, A-tailing, Adaptor Ligation, and PCR. The final libraries contain the P5 and P7 primers used in Illumina amplification.

### Amplified cDNA processing (dual index)

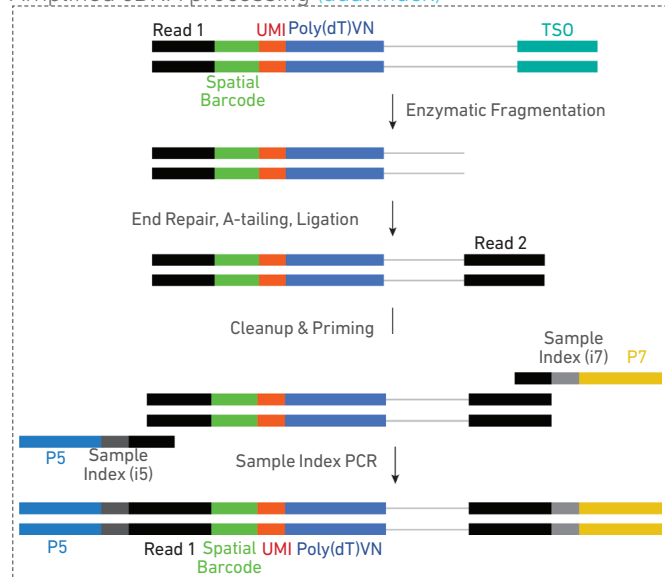

## Step 6 Sequencing

A Visium Spatial Gene Expression library comprises standard Illumina paired-end constructs which begin and end with P5 and P7. The 16 bp Spatial Barcode and 12 bp UMI are encoded in Read 1, while Read 2 is used to sequence the cDNA fragment. i7 and i5 sample index sequences are incorporated. TruSeq Read 1 and TruSeq Read 2 are standard Illumina sequencing primer sites used in paired-end sequencing.

Illumina sequencer compatibility, sample indices, library loading and pooling for sequencing are summarized in step 6.

### Visium Spatial Gene Expression Library

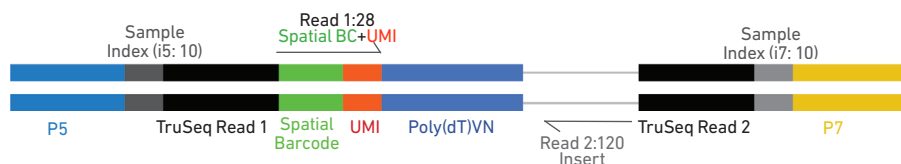

[See Appendix for Oligonucleotide Sequences](#)



# Tips & Best Practices

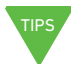

Icons

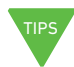

Tips & Best Practices section includes additional guidance

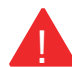

Signifies critical step requiring accurate execution

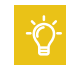

Troubleshooting section includes additional guidance

General Reagent Handling

- Fully thaw and thoroughly mix reagents before use.
- Keep all enzymes and Master Mixes on ice during setup and use. Promptly move reagents back to the recommended storage.
- Use a pH meter to adjust pH as necessary during buffer preparation.

Pipette Calibration

- Follow manufacturer's calibration and maintenance schedules.
- Pipette accuracy is particularly important when using SPRIselect reagents.

Visium Spatial Gene Expression Slide

- Includes 4 Capture Areas (6.5 x 6.5 mm), each with ~5,000 unique gene expression spots.
- Each gene expression spot includes primers with a unique Spatial Barcode (see [Stepwise Objectives](#) for additional information).
- The active surface of the slide is defined by a readable label that includes the serial number.
- The tissue sections are always placed on the active surface of the Capture Areas. For more information, consult the Visium Spatial Protocols – Tissue Preparation Guide (Demonstrated Protocol CG000240).

Visium Spatial Gene Expression Slide

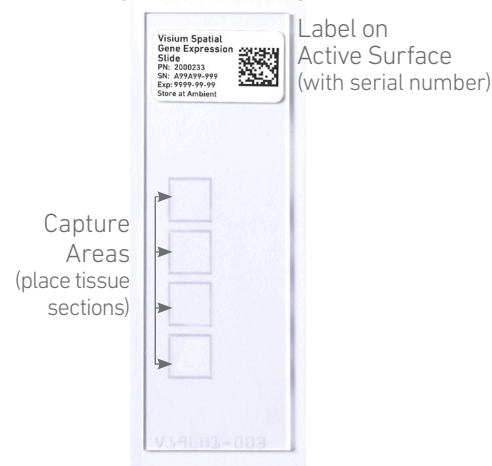

Note the serial number on the slide label; will be required for downstream analysis.

Slide Storage

- Always store slides in a cool, dry environment.
- Store unused slides in original packaging and keep sealed. DO NOT remove dessicant. If necessary, place the sealed container in a secondary container, such as a resealable bag.
- After tissue placement, store the slides at **-80°C** in a sealed container.

Slide Storage

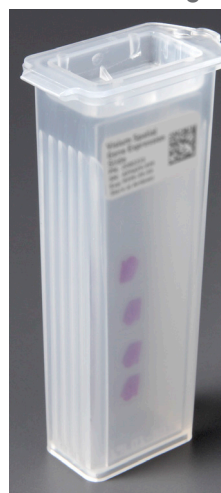

## Slide Handling

- Always wear gloves when handling slides.
- Ensure that the active surface of a slide faces up and is never touched. The orientation of the label on the slide defines the active surface.
- The tissue sections should always be on the active surface of the slide. DO NOT touch the tissue sections.
- Minimize exposure of the slides to sources of particles and fibers.
- When immersing slides in water, ensure that the tissue sections are completely submerged.
- Keep the slide flat on a clean work surface when adding reagents to the active surface.
- Ensure that no absorbent surface is in contact with the reagents on the slide during incubation.

### Active Surface with Tissue Sections

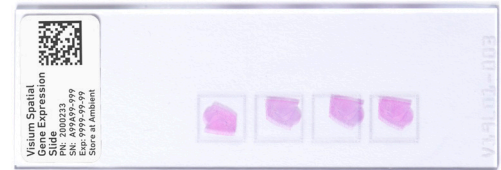

### Immersing Slide

Correct

Incorrect

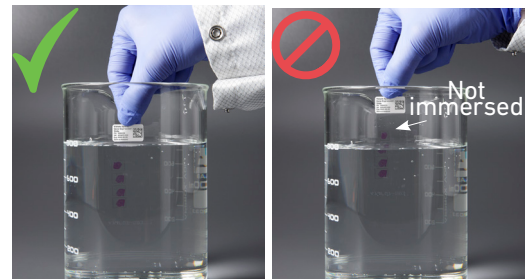

### Reagent on Slide

Correct

Incorrect

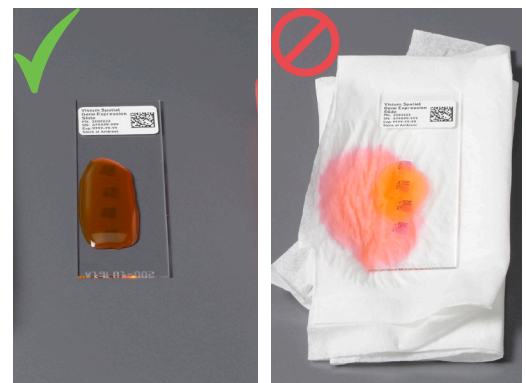

## Slide Cassette

- The Slide Cassette encases the slide and creates leakproof wells for adding reagents.
- Place the slides in the Slide Cassette only when specified.
- The Slide Cassette is disposable and intended for one-time use.
- An Insert Clip and four tabs at the back of the Slide Cassette are used for holding the slide in the cassette, as shown.
- The cassette includes a removable gasket (disposable; one-time use) corresponding to the Capture Areas on the slides.
- The Slide Cassette may be assembled using the Slide Alignment Tool or manually. Instructions for both are provided in the following section.
- See Slide Cassette Assembly & Removal instructions for details.
- Ensure that the back of the Slide Cassette is facing the user prior to assembly. The active surface of the slide with tissue sections will face down such that the slide label is no longer readable.
- Practice assembly with a plain glass slide.

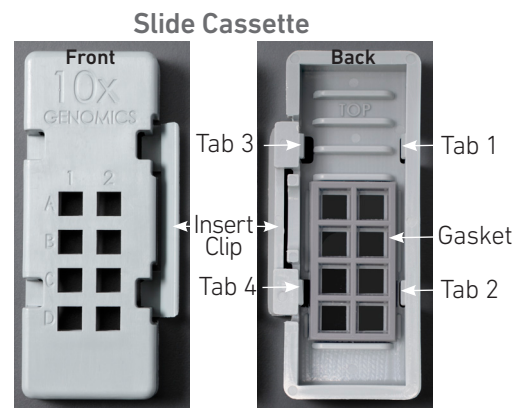

## Slide Alignment Tool

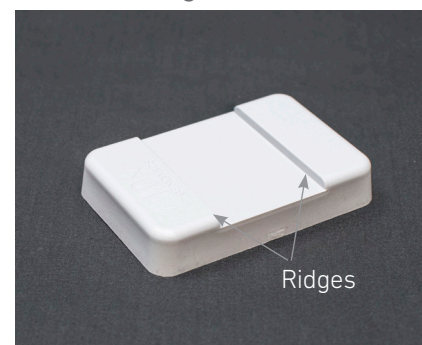

Slide Cassette Assembly

Position Slide Cassette along alignment tool ridges

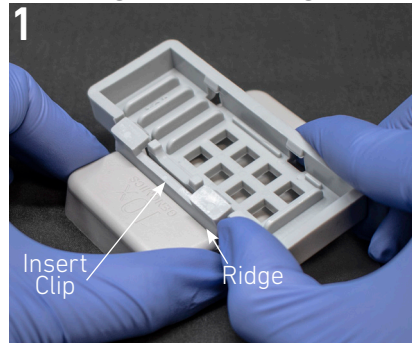

Push Insert Clip along the ridge & press Slide Cassette down

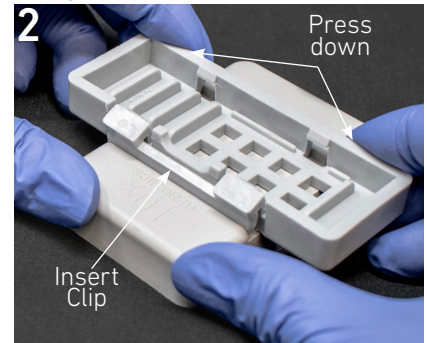

Slide Cassette secured on alignment tool

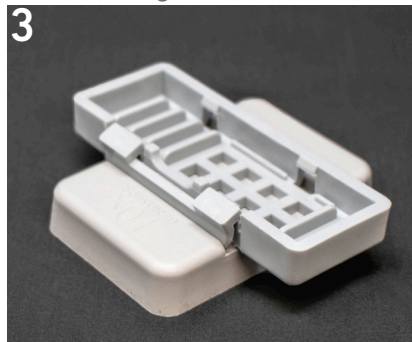

Position Gasket to align with Slide Cassette cutouts

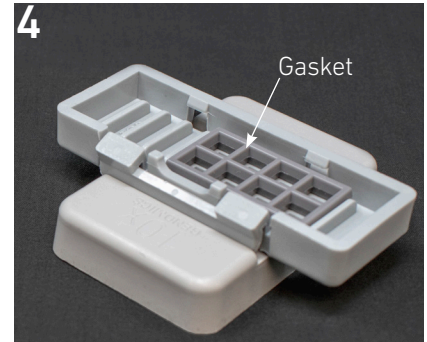

Insert long edge of slide under tabs 1 & 2; ensure slide is flush

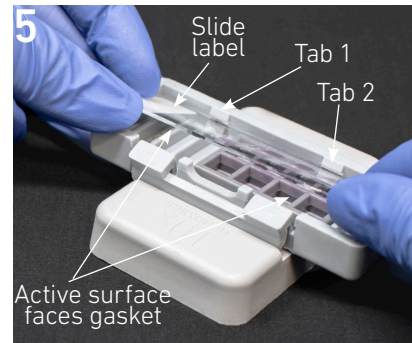

Press slide down until it is flush with the gasket and under tabs 3 & 4

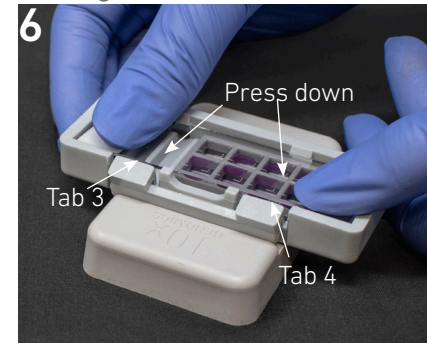

Remove Slide Cassette while pressing slide against the gasket

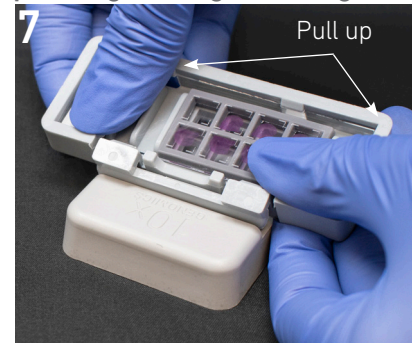

**!** Slide insertion may push gasket out of alignment with slide cutouts. Adjust if necessary.

Slide Cassette Removal\*

1 Position Slide Cassette along alignment tool ridges

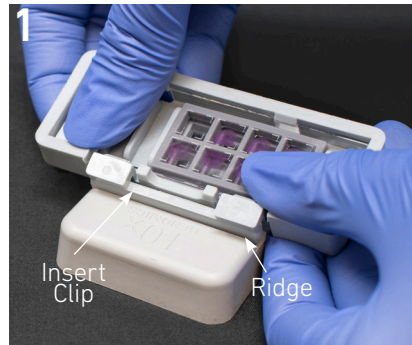

2 Push Insert Clip along the ridge & press down

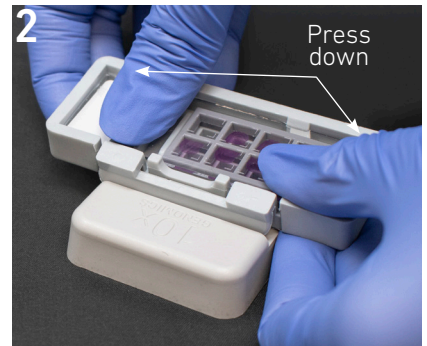

3 Slide Cassette Sits securely on alignment tool

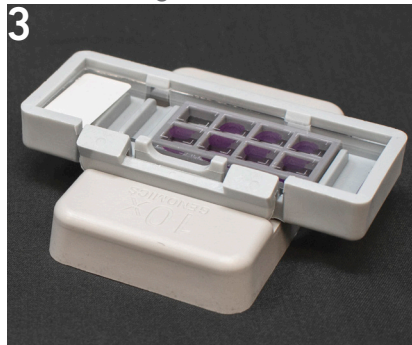

4 Lift slide at Slide Cassette groove

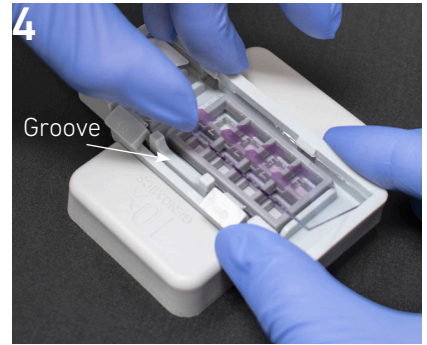

\*Slide removal not needed for the Visium Spatial Gene Expression protocol.

Manual  
Slide Cassette  
Assembly &  
Removal

**Assembly**

- i. Insert the gasket and align the gasket and Slide Cassette cutouts.
- ii. Align the label on top of the slide to the top of the Slide Cassette, as shown.
- iii. Insert the slide under tabs 1 and 2. Ensure that the long edge of the slide is flush with the side of the Slide Cassette.
- iv. Press the insert clip **very firmly** by applying even force on the lower part of the insert clip.
- v. Press down on the slide with a finger in between tabs 3 and 4 until the slide is under each tab and release the insert clip.

**Removal\***

- i. Press the insert clip **very firmly** to release the slide from the cassette.
- ii. Lift slide at Slide Cassette groove between tabs 3 and 4 until the slide can be removed.

\*Slide removal not needed for the Visium Spatial Gene Expression protocol.

Slide Cassette

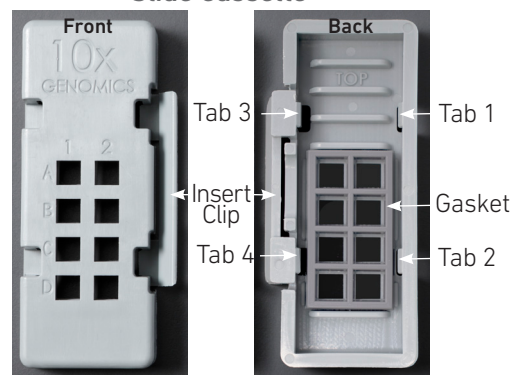

Slide Cassette Assembly

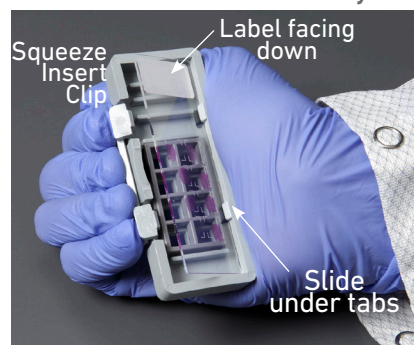

Insert Clip - Press Firmly

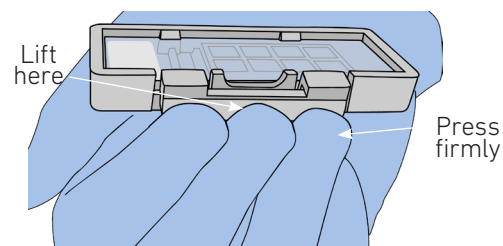

## Reagent Addition & Removal from Wells

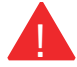

- Place the assembled slide in the Slide Cassette flat on a clean work surface.
- Dispense and remove reagents along the side of the wells without touching the tissue sections and without introducing bubbles.
- Always cover the tissue section completely when adding reagents to the well. A gentle tap may help spread the reagent more evenly.
- Ensure that no bubbles are introduced in the process.

### Reagent Addition/Removal

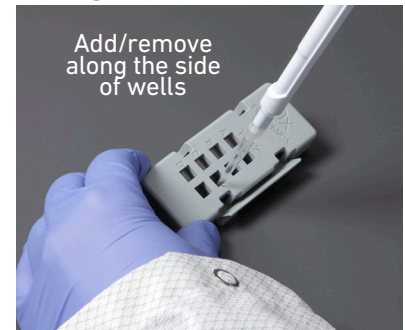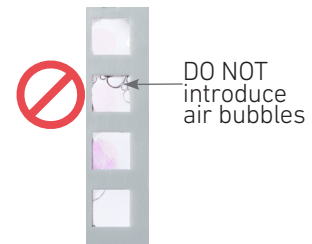

## Slide Seal Application & Removal

### Application

- Place the Slide Cassette flat on a clean work surface.
- Remove the back of the adhesive Slide Seal.
- Align the Slide Seal with the surface of the Slide Cassette and apply while firmly holding the Slide Cassette with one hand.
- Press on the Slide Seal to ensure uniform adhesion.

### Removal

- Place the Slide Cassette flat on a clean work surface.
- Pull on the Slide Seal from the edge while firmly holding the Slide Cassette. Ensure that no liquid splashes out of the wells.

### Slide Seal Application

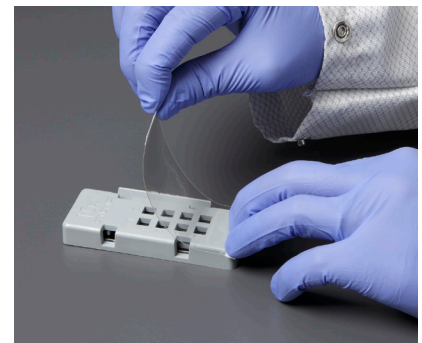



Slide Incubation  
Guidance

Incubation at a specified temperature

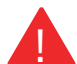

- Position a Thermocycler Adaptor on a thermal cycler that is set at the incubation temperature.
- Ensure that the Thermocycler Adaptor is in contact with the thermal cycler surface uniformly.
- When incubating a slide, position the slide on the Thermocycler Adaptor with the active surface facing up.
- Ensure that the entire bottom surface of the slide is in contact with Thermocycler Adaptor.
- When incubating a slide encased in a Slide Cassette, place the assembled unit on the Thermocycler Adaptor with the wells facing up. The Slide Cassette should always be sealed when on the Thermocycler Adaptor.

Place Thermocycler Adaptor

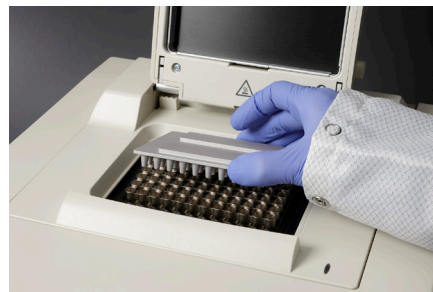

Incubate Slide

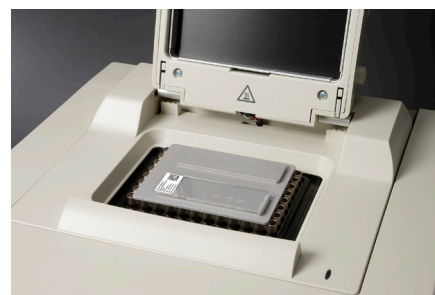

Incubate Assembled Slide Cassette

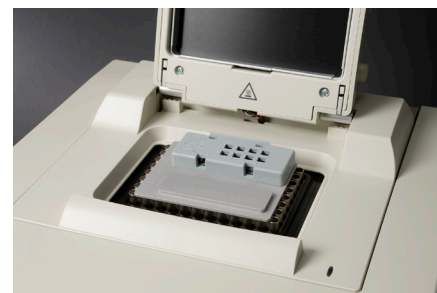

Incubation at room temperature

- Place the slide/Slide Cassette on a flat, clean work surface.
- Ensure that no absorbent surface is in contact with the reagents on the slide during incubation.

Slide Incubation

Correct

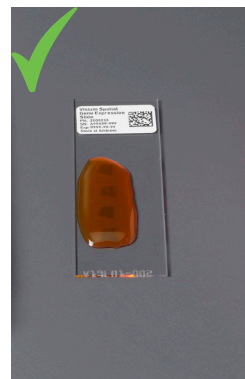

Incorrect

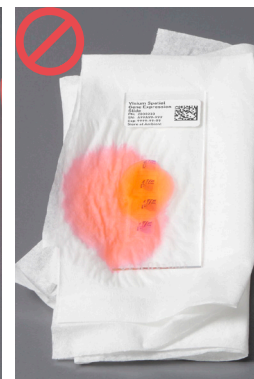

### 10x Magnetic Separator

- Offers two positions of the magnets (high and low) relative to a tube, depending on its orientation. Flip the magnetic separator over to switch between high (magnet•**High**) or low (magnet•**Low**) positions.
- If using MicroAmp 8-Tube Strips, use the high position (magnet•**High**) only throughout the protocol.

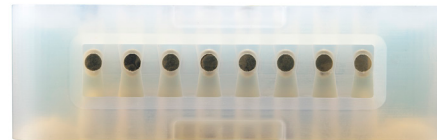

### Magnetic Bead Cleanup Steps

- During magnetic bead based cleanup steps that specify waiting “until the solution clears”, visually confirm clearing of solution before proceeding to the next step. See adjacent panel for an example.
- The time needed for the solution to clear may vary based on specific step, reagents, volume of reagents etc.

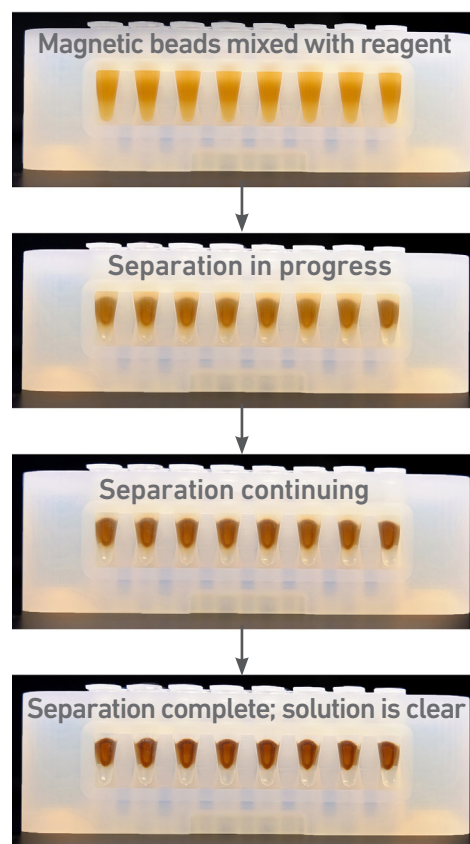

SPRIselect  
Cleanup &  
Size Selection

- After aspirating the desired volume of SPRIselect reagent, examine the pipette tips before dispensing to ensure the correct volume is transferred.
- Pipette mix thoroughly as insufficient mixing of sample and SPRIselect reagent will lead to inconsistent results.
- Use fresh preparations of 80% Ethanol.

**Tutorial — SPRIselect Reagent:DNA Sample Ratios**

SPRI beads selectively bind DNA according to the ratio of SPRIselect reagent (beads).

Example: Ratio =  $\frac{\text{Volume of SPRIselect reagent added to the sample}}{\text{Volume of DNA sample}} = \frac{50 \mu\text{l}}{100 \mu\text{l}} = 0.5X$

**Schematic of Double Sided Size Selection**

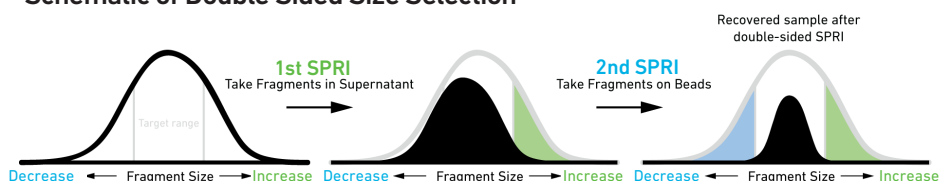

After the first SPRI, supernatant is transferred for a second SPRI while larger fragments are discarded (green). After the second SPRI, fragments on beads are eluted and kept while smaller fragments are discarded (blue). Final sample has a tight fragment size distribution with reduced overall amount (black).

**Tutorial — Double Sided Size Selection**

**Step a – First SPRIselect:** Add 50  $\mu\text{l}$  SPRIselect reagent to 100  $\mu\text{l}$  sample (0.5X).

Ratio =  $\frac{\text{Volume of SPRIselect reagent added to the sample}}{\text{Volume of DNA sample}} = \frac{50 \mu\text{l}}{100 \mu\text{l}} = 0.5X$

**Step b – Second SPRIselect:** Add 30  $\mu\text{l}$  SPRIselect reagent to supernatant from step a (0.8X).

Ratio =  $\frac{\text{Total Volume of SPRIselect reagent added to the sample (step a + b)}}{\text{Original Volume of DNA sample}} = \frac{50 \mu\text{l} + 30 \mu\text{l}}{100 \mu\text{l}} = 0.8X$

Enzymatic  
Fragmentation

- Ensure enzymatic fragmentation reactions are prepared on ice and then loaded into a thermal cycler pre-cooled to 4°C prior to initiating the Fragmentation, End Repair, and A-tailing incubation steps.

Sample Indices (i5/i7) in  
Sample Index PCR

- Choose the appropriate sample index sets to ensure that no sample indices overlap in a multiplexed sequencing run.
- Each well in the Dual Index Plate TT Set A contains a unique i7 and a unique i5 oligonucleotide.

## Index Hopping Mitigation

Index hopping can impact pooled samples sequenced on Illumina sequencing platforms that utilize patterned flow cells and exclusion amplification chemistry. To minimize index hopping, follow the guidelines listed below.

- Remove adapters during cleanup steps.
- Ensure no leftover primers and/or adapters are present when performing post-Library Construction QC.
- Store each library individually at **4°C** for up to **72 h** or at **-20°C** for **long-term** storage. **DO NOT** pool libraries during storage.
- Pool libraries prior to sequencing. An additional 1.0X SPRI may be performed for the pooled libraries to remove any free adapters before sequencing.
- Hopped indices can be computationally removed from the data generated from Visium Spatial Gene Expression dual index libraries.

# Sample Preparation Guidelines

## Sample Preparation Guidelines

Proper tissue handling and preparation techniques are critical in preserving the morphological quality of the tissue sections and subsequent transcript profiling using Visium Spatial protocols.

Listed below are some key considerations for preparing samples that are compatible with the Visium Spatial protocols.

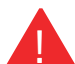

Consult the Visium Spatial Protocols – Tissue Preparation Guide for complete information (Demonstrated Protocol CG000240).

### Key Considerations

#### Slide Handling (before sectioning)

- Equilibrate Visium slides to cryostat temperature before cryosectioning.
- Store unused slides in original packaging and keep sealed. **DO NOT** remove desiccant. If necessary, store original packaging in a secondary container such as a resealable bag.

#### Freezing and Embedding

- Snap freeze samples in a bath of isopentane and liquid nitrogen.
- Store frozen samples at **-80°C** in a sealed container for **long-term** storage prior to embedding.

#### Cryosectioning

- Equilibrate OCT tissue block to the cryostat chamber temperature for **30 min**.
- Place tissue sections on the Capture Area within the fiducial frame on the slide.

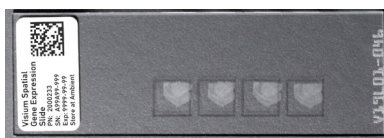

#### Slide Handling (after sectioning)

- Maintain slides containing sections in a low moisture environment.
- Keep slides cold and transport slides on dry ice.
- DO NOT** leave slides at room temperature.

#### Sample Storage

- Store slides individually in a sealed container at **-80°C** for up to a **week** to avoid multiple freeze thaw cycles. If necessary, place the sealed container in a secondary container, such as a resealable bag.

# Tissue Optimization Guidelines

## Tissue Optimization Guidelines

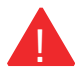

Prior to using a new tissue type for generating Visium Spatial Gene Expression libraries, the permeabilization time should be optimized. Failure to optimize the permeabilization time can diminish the efficiency of the assay significantly.

Refer to the Visium Spatial Gene Expression Reagent Kits – Tissue Optimization User Guide (CG000238) for the complete protocol for optimizing permeabilization time for any tissue of interest.

Briefly, the Visium Spatial Tissue Optimization workflow includes placing tissue sections on 7 Capture Areas on a Visium Tissue Optimization slide. The sections are fixed, stained, and then permeabilized for different times. mRNA released during permeabilization binds to oligonucleotides on the Capture Areas. Fluorescent cDNA is synthesized on the slide and imaged. The permeabilization time that results in maximum fluorescence signal with the lowest signal diffusion is optimal. If the signal is the same at two time points, the longer permeabilization time is considered optimal.

## Tissue Optimization Workflow

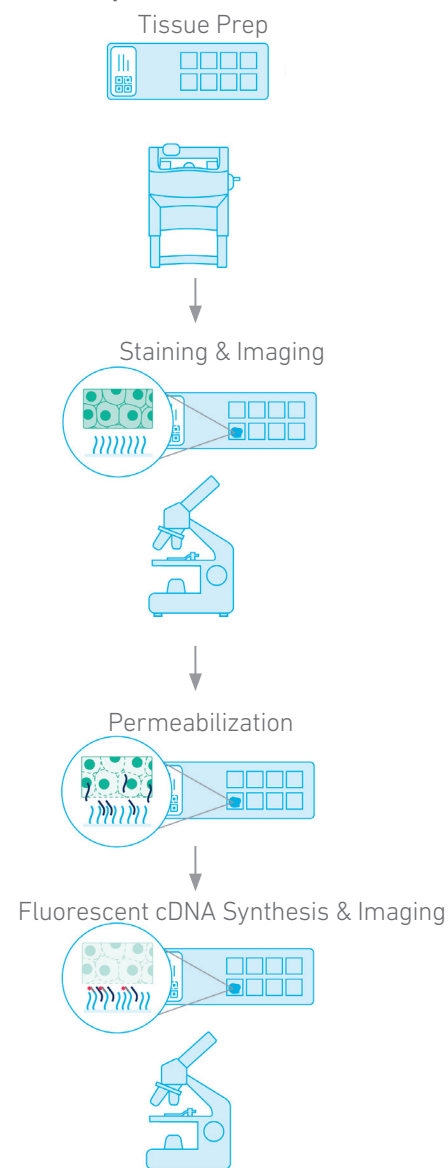

### Example: Tissue Permeabilization Time Course

Mouse brain sections were imaged after permeabilization and fluorescent cDNA synthesis, using a Nikon Eclipse Ti2 microscope.

- Positive control: Strong fluorescent signal.
- Negative Control: No fluorescent signal.
- **Optimal signal: 18 min.**  
Use for Visium Spatial Gene Expression protocol.

#### Permeabilization Time Course (min)

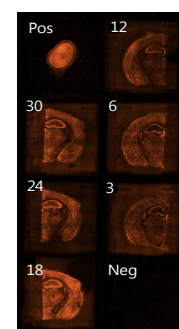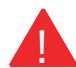

Choose the permeabilization time that results in maximum fluorescence signal with the lowest signal diffusion. If the signal is the same at two time points, choose the longer permeabilization time.

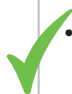



# Step 1

## Tissue Staining & Imaging

- 1.1 Tissue Fixation
- 1.2 Tissue Staining
- 1.3 Tissue Imaging

# 1

## 1.0 Tissue Staining & Imaging

| CHECKLIST – GET STARTED! |                                                                                      |                        |                                                                                                                                                                                                                                                                                                                                |         |
|--------------------------|--------------------------------------------------------------------------------------|------------------------|--------------------------------------------------------------------------------------------------------------------------------------------------------------------------------------------------------------------------------------------------------------------------------------------------------------------------------|---------|
| Items                    | 10x PN                                                                               | Preparation & Handling | Storage                                                                                                                                                                                                                                                                                                                        |         |
| <b>Place at -20°C</b>    |                                                                                      |                        |                                                                                                                                                                                                                                                                                                                                |         |
| <b>Methanol</b>          |                                                                                      |                        |                                                                                                                                                                                                                                                                                                                                |         |
| <input type="checkbox"/> | Dispense 40 ml/slide* in a 50-ml centrifuge tube                                     | -                      | Chill to <b>-20°C</b> before use.                                                                                                                                                                                                                                                                                              | Ambient |
| <b>Obtain</b>            |                                                                                      |                        |                                                                                                                                                                                                                                                                                                                                |         |
| <input type="checkbox"/> | <b>Visium Spatial Gene Expression Slide</b><br>(with tissue sections)                | 2000233                |  Note the serial number on the slide label; will be required for downstream analysis.<br><br>For sample preparation, consult the Visium Spatial Protocols – Tissue Preparation Guide (CG000240).                                             | -80°C   |
| <input type="checkbox"/> | <b>Slide Cassette</b>                                                                | 3000406                | See Tips & Best Practices.                                                                                                                                                                                                                                                                                                     | Ambient |
| <input type="checkbox"/> | <b>Isopropanol</b>                                                                   | -                      | Manufacturer's recommendations.                                                                                                                                                                                                                                                                                                | Ambient |
| <input type="checkbox"/> | <b>Hematoxylin, Mayer's (Lillie's Modification)</b>                                  | -                      | Manufacturer's recommendations.                                                                                                                                                                                                                                                                                                | Ambient |
| <input type="checkbox"/> | <b>Eosin Y Solution</b>                                                              | -                      | Manufacturer's recommendations.                                                                                                                                                                                                                                                                                                | Ambient |
| <input type="checkbox"/> | <b>Bluing Buffer</b>                                                                 | -                      | Manufacturer's recommendations.                                                                                                                                                                                                                                                                                                | Ambient |
| <input type="checkbox"/> | <b>Milli-Q Water</b>                                                                 | -                      | -                                                                                                                                                                                                                                                                                                                              | -       |
| <input type="checkbox"/> | <b>250 ml Vacuum Filter/ Storage Bottle System</b><br>(0.2 µm Filter Nylon membrane) | -                      | -                                                                                                                                                                                                                                                                                                                              | -       |
| <input type="checkbox"/> | <b>Tris Base</b>                                                                     | -                      | Manufacturer's recommendations.                                                                                                                                                                                                                                                                                                | -       |
| <input type="checkbox"/> | <b>Acetic Acid</b>                                                                   | -                      | Manufacturer's recommendations.                                                                                                                                                                                                                                                                                                | -       |
| <b>Prepare</b>           |                                                                                      |                        |                                                                                                                                                                                                                                                                                                                                |         |
| <input type="checkbox"/> | <b>Tris-Acetic Acid Buffer</b><br>(0.45 M, pH 6.0)<br>pH meter will be required      |                        | Prepare <b>200 ml</b> , store at <b>room temperature</b> .<br>• Dissolve <b>11 g</b> Tris base in <b>100 ml</b> nuclease-free water.<br>• Adjust pH to <b>6.0</b> using <b>100% Acetic Acid</b> .<br>• Bring volume to <b>200 ml</b> with nuclease-free water.<br>• Filter through <b>0.2 µm</b> nylon membrane filter system. |         |

 Ensure that microscope settings have been optimized to capture brightfield images.

Consult the Visium Spatial Gene Expression Imaging Guidelines Technical Note (CG000241) for more information.

\*If using a Simport Scientific LockMailer Slide Mailer, dispense 10 ml/slide methanol.

## 1.1 Tissue Fixation

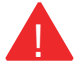

Note the serial number on the slide label; will be required for downstream analysis.

Ensure that the methanol (40 ml/slide) dispensed in a 50-ml centrifuge tube is chilled to  $-20^{\circ}\text{C}$ .

- a. Place a Thermocycler Adaptor on a thermal cycler set at  $37^{\circ}\text{C}$  and equilibrate for **5 min**. Heating the thermal cycler lid is not required.
- b. Remove slide from  $-80^{\circ}\text{C}$  and place on dry ice in a sealed container.

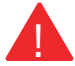

Delay in transferring slides to dry ice may result in condensation, which may cause tissue damage and/or shifting of tissue sections on the slide.

- c. Place on the Thermocycler Adaptor with the active surface facing up and incubate **1 min** at  $37^{\circ}\text{C}$ . **DO NOT** close the thermal cycler lid. Maintain thermal cycler at  $37^{\circ}\text{C}$  for step 1.2.
- d. If necessary, wipe excess liquid from the back of the slide, without touching the tissue sections.
- e. Completely immerse the slide in the pre-chilled methanol. Secure the tube cap to prevent methanol loss.
- f. Incubate **30 min** at  $-20^{\circ}\text{C}$ .

### Place Thermocycler Adaptor

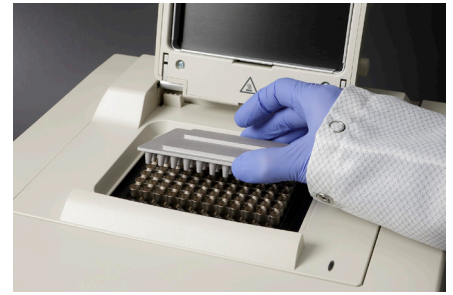

### Incubate Slide for 1 min at $37^{\circ}\text{C}$

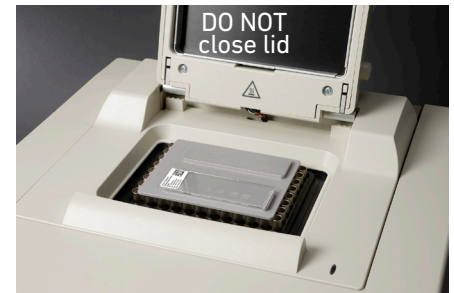

### Incubate in Methanol for 30 min at $-20^{\circ}\text{C}$

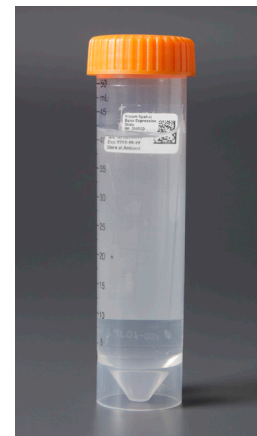

## 1.2 Tissue Staining

- a. Dispense the following volumes of Milli-Q water.
- 50 ml** in one 50-ml centrifuge tube/slide
  - 800 ml** in Beaker 1
  - 800 ml** in Beaker 2
  - 800 ml** in Beaker 3
- Dispensed volume in each beaker can be used for two slides.

- b. Prepare Eosin Mix. **DO NOT** add pure eosin to tissue sections.

| Eosin Mix<br><i>Prepare fresh. Vortex, centrifuge briefly.</i> | Volume/slide<br>( $\mu$ l) |
|----------------------------------------------------------------|----------------------------|
| Eosin Y Solution                                               | 100                        |
| Tris-Acetic Acid Buffer (0.45 M, pH 6.0)                       | 900                        |
| <b>Total</b>                                                   | <b>1,000</b>               |

- c. Remove slide from methanol and wipe excess liquid from the back of the slide, without touching the tissue sections. Place on a flat, clean work surface. Some residual droplets may remain.

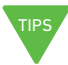

- d. Add **500  $\mu$ l** isopropanol to uniformly cover all tissue sections on the slide. See Tips & Best Practices.

- e. Incubate **1 min** at **room temperature**.

When incubating the slide with reagents, ensure that the slide is not in contact with any absorbent surface, like laboratory wipes, which may absorb the reagents.

- f. Discard reagent by draining and/or holding the slide at an angle with the bottom edge in contact with a laboratory wipe.

- g. Wipe excess liquid from the back of the slide, without touching the tissue sections. Place on a flat, clean work surface.

- h. Air dry the slide. To prevent tissue section from over drying, **DO NOT** exceed **10 min**.

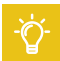

- i. Add **1 ml** Hematoxylin to uniformly cover all tissue sections on the slide.

- j. Incubate **7 min** at **room temperature**.

- k. Discard reagent by draining and/or holding the slide at an angle with the bottom edge in contact with a laboratory wipe.

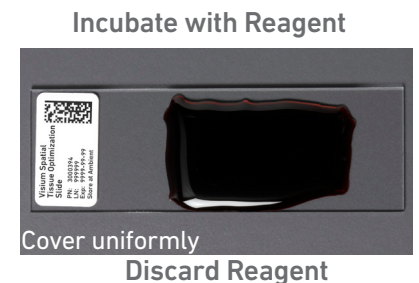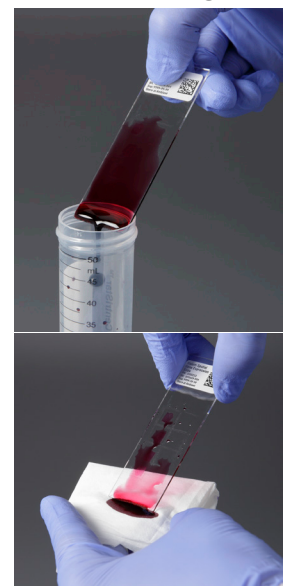

Slides in images are representative.

l. Immerse the slide 5x in the water in centrifuge tube.

m. Immerse the slide 15x in the water in Beaker 1.

n. Immerse the slide 15x in the water in Beaker 2.

o. Wipe excess liquid from the back of the slide without touching the tissue section. Place on a flat, clean work surface. Some droplets may remain.

p. Add 1 ml Bluing Buffer to uniformly cover all tissue sections.

q. Incubate 2 min at room temperature.

r. Discard reagent by draining and/or holding the slide at an angle with the bottom edge in contact with a laboratory wipe.

s. Immerse the slide 5x in the water in Beaker 2.

t. Wipe excess liquid from the back of the slide without touching the tissue section. Place on a flat, clean work surface. Some droplets may remain.

u. Add 1 ml Eosin Mix to uniformly cover all tissue sections.

v. Incubate 1 min at room temperature.

w. Discard reagent by draining and/or holding the slide at an angle with the bottom edge in contact with a laboratory wipe.

x. Immerse the slide 15x in the water in Beaker 3.

y. Wipe the back of the slide with a laboratory wipe. Place on a flat, clean work surface. and air dry until tissue is opaque.

z. Incubate slide on the Thermocycler Adaptor with the thermal cycler lid open for 5 min at 37°C.

Proceed to imaging.

OPTIONAL: A coverslip may be mounted on the slide before imaging. See [Appendix](#) for Coverslip Application & Removal protocol.

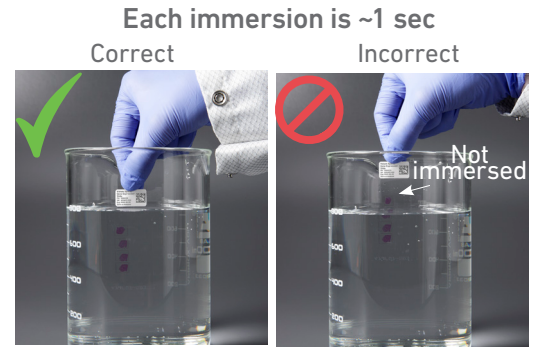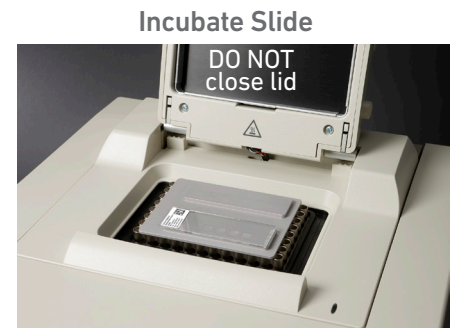

### 1.3 Imaging

- Image all four Capture Areas individually at the desired magnification using brightfield imaging settings. See [Imaging System Recommendations](#) for more information.

Consult the Visium Spatial Gene Expression Imaging Guidelines Technical Note (CG000241) for complete information.

# Step 2

## Permeabilization & Reverse Transcription

- 2.1 Tissue Permeabilization
- 2.2 Reverse Transcription

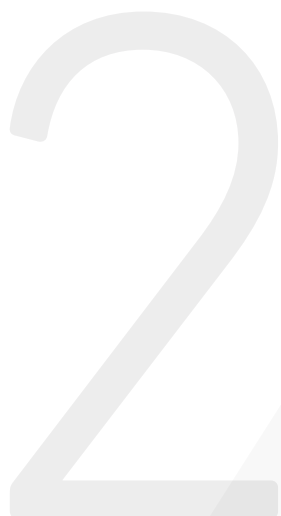

## 2.0 Permeabilization & Reverse Transcription

| CHECKLIST – GET STARTED!                                             |                                       |                                                                                                                                                                                       |         |          |
|----------------------------------------------------------------------|---------------------------------------|---------------------------------------------------------------------------------------------------------------------------------------------------------------------------------------|---------|----------|
| Items                                                                | 10x PN                                | Preparation & Handling                                                                                                                                                                | Storage |          |
| <b>Prepare &amp; equilibrate to 37°C</b>                             |                                       |                                                                                                                                                                                       |         |          |
| <input type="checkbox"/> ● Permeabilization Enzyme                   | 2000214                               | Immediately before use, centrifuge briefly and resuspend in 1.2 ml HCl (0.1N), pipette mix, centrifuge briefly, verify no precipitate. Equilibrate to 37°C.                           | -20°C   |          |
|                                                                      |                                       |  Store unused resuspended enzyme at -20°C. DO NOT freeze-thaw more than 3x.                          |         |          |
| <b>Equilibrate to room temperature</b>                               |                                       |                                                                                                                                                                                       |         |          |
| <input type="checkbox"/> ● RT Reagent                                | 2000086                               | Thaw, vortex, verify no precipitate, centrifuge briefly.                                                                                                                              | -20°C   |          |
| <input type="checkbox"/> ● Template Switch Oligo                     | 3000228                               | Centrifuge briefly, resuspend in 80 µl Low TE Buffer. Vortex 15 sec at maximum speed, centrifuge briefly, leave at room temperature for ≥ 30 min. After resuspension, store at -80°C. | -20°C   |          |
| <input type="checkbox"/> ○ Reducing Agent B                          | 2000087                               | Thaw, vortex, verify no precipitate, centrifuge briefly.                                                                                                                              | -20°C   |          |
| <b>Place on ice</b>                                                  |                                       |                                                                                                                                                                                       |         |          |
| <input type="checkbox"/> ● RT Enzyme D                               | 2000216/<br>2000227                   | Pipette mix, centrifuge briefly.                                                                                                                                                      | -20°C   |          |
| <b>Obtain</b>                                                        |                                       |                                                                                                                                                                                       |         |          |
| <input type="checkbox"/> Nuclease-free Water                         | -                                     | -                                                                                                                                                                                     | Ambient |          |
| <input type="checkbox"/> 20X SSC                                     | -                                     | -                                                                                                                                                                                     | Ambient |          |
| <input type="checkbox"/> Slide Seals                                 | 3000279                               | See Tip & Best Practices                                                                                                                                                              | Ambient |          |
| <b>Prepare</b>                                                       |                                       |                                                                                                                                                                                       |         |          |
| <input type="checkbox"/> 0.1X SSC<br>(can be prepared ahead of time) | 0.1X SSC<br>Store at room temperature |                                                                                                                                                                                       | Stock   | Final    |
|                                                                      | SSC                                   |                                                                                                                                                                                       | 20X     | 0.1X     |
|                                                                      | Water                                 |                                                                                                                                                                                       | -       | -        |
|                                                                      |                                       |                                                                                                                                                                                       | 50 ml   | 250 µl   |
|                                                                      |                                       |                                                                                                                                                                                       |         | 49.75 ml |

## 2.1 Tissue Permeabilization

If a coverslip was mounted on the slide for imaging, remove the coverslip. See [Appendix](#) for Coverslip Application & Removal protocol. Ensure that the Permeabilization Enzyme is resuspended and equilibrated to 37°C.

- a. Place a Thermocycler Adaptor in the thermal cycler. Prepare the thermal cycler with the following incubation protocol and start the program.

| Lid Temperature | Reaction Volume | Run Time |
|-----------------|-----------------|----------|
| 37°C            | -               | *        |

  

| Step             | Temperature | Time                                         |
|------------------|-------------|----------------------------------------------|
| Pre-equilibrate  | 37°C        | Hold                                         |
| Permeabilization | 37°C        | *Determined by Tissue Optimization protocol. |

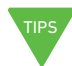

- b. Place the slide in the Slide Cassette. See Tips & Best Practices for assembly instructions. Practice assembly with a blank slide.

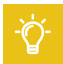

- c. Add 70 µl Permeabilization Enzyme along the side of the wells to uniformly cover the tissue sections, without introducing bubbles.

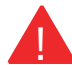

Tap Slide Cassette gently to ensure uniform coverage.

- d. Apply Slide Seal on the Slide Cassette and place the Slide Cassette on the Thermocycler Adaptor at 37°C.

- e. Close the thermal cycler lid and incubate for the pre-determined permeabilization time (tissue type specific).

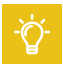

Consult the Visium Spatial Gene Expression Reagent Kits – Tissue Optimization User Guide (CG000238) for the complete protocol for optimizing permeabilization time for any tissue of interest.

- f. Remove the Slide Cassette from the Thermocycler Adaptor and place on a flat, clean work surface.

- g. Using a pipette, remove Permeabilization Enzyme from the well corners.

- h. Add 100 µl 0.1X SSC to the wells.

### Slide Cassette Assembly

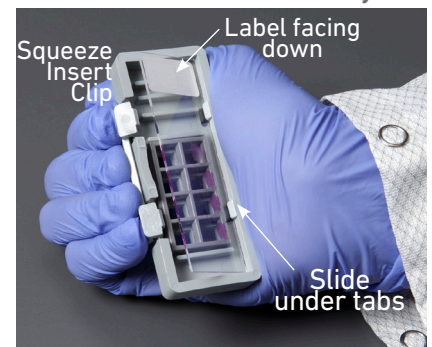

### Add Reagent

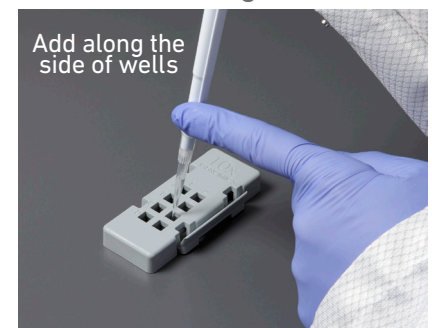

### Apply Slide Seal

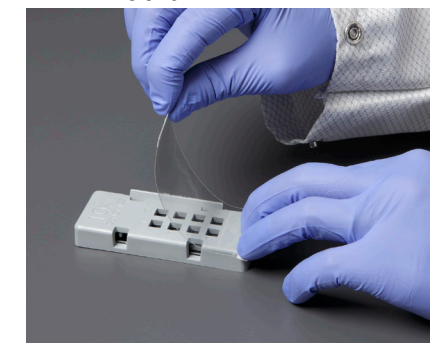



## 2.2 Reverse Transcription

- a. Place a Thermocycler Adaptor in the thermal cycler. Prepare a thermal cycler with the following incubation protocol and start the program.

| Lid Temperature | Reaction Volume | Run Time |
|-----------------|-----------------|----------|
| 53°C            | -               | 45 min   |

  

| Step                  | Temperature | Time     |
|-----------------------|-------------|----------|
| Pre-equilibrate       | 53°C        | Hold     |
| Reverse Transcription | 53°C        | 00:45:00 |
| Hold                  | 4°C         | -        |

- b. Prepare RT Master Mix on ice. Pipette mix 10x and centrifuge briefly.

| RT Master Mix<br><i>Add reagents in the order listed.</i> | PN                  | Volume/slide +<br>10% (µl) | Volume/2 slides +<br>10% (µl) |
|-----------------------------------------------------------|---------------------|----------------------------|-------------------------------|
| Nuclease-free Water                                       | -                   | 166.3                      | 332.6                         |
| ● RT Reagent                                              | 2000086             | 82.7                       | 165.4                         |
| ● Template Switch Oligo                                   | 3000228             | 22.9                       | 45.8                          |
| ○ Reducing Agent B                                        | 2000087             | 6.6                        | 13.2                          |
| ● RT Enzyme D                                             | 2000085/<br>2000227 | 51.5                       | 103.0                         |
| <b>Total</b>                                              | -                   | <b>330</b>                 | <b>660</b>                    |

- c. Remove 0.1X SSC from the wells.
- d. Add 75 µl RT Master Mix to each well.
- e. Apply Slide Seal on the Slide Cassette and place on the Thermocycler Adaptor on the pre-heated thermal cycler. Close the thermal cycler lid.
- f. Skip Pre-equilibrate step to initiate Reverse Transcription.

# Step 3

## Second Strand Synthesis & Denaturation

- 3.1 Second Strand Synthesis
- 3.2 Denaturation

3

### 3.0 Second Strand Synthesis

#### CHECKLIST – GET STARTED!

| Items                                                                                          | 10x PN              | Preparation & Handling            | Storage |
|------------------------------------------------------------------------------------------------|---------------------|-----------------------------------|---------|
| <b>Equilibrate to room temperature</b>                                                         |                     |                                   |         |
| <input type="checkbox"/> ● <b>Second Strand Reagent</b>                                        | 2000219             | Thaw, vortex, centrifuge briefly. | -20°C   |
| <input type="checkbox"/> ● <b>Second Strand Primer</b>                                         | 2000217             | Thaw, vortex, centrifuge briefly. | -20°C   |
| <b>Place on ice</b>                                                                            |                     |                                   |         |
| <input type="checkbox"/> ● <b>Second Strand Enzyme</b>                                         | 2000218/<br>2000183 | Pipette mix, centrifuge briefly.  | -20°C   |
| <b>Obtain</b>                                                                                  |                     |                                   |         |
| <input type="checkbox"/> <b>Nuclease-free Water</b>                                            | -                   |                                   | Ambient |
| <input type="checkbox"/> <b>0.08 M KOH</b><br>Dilute fresh from stock;<br>prepare 500 µl/slide | -                   | Manufacturer's recommendations.   | Ambient |
| <input type="checkbox"/> <b>Qiagen Buffer EB</b>                                               | -                   | Manufacturer's recommendations.   | Ambient |
| <input type="checkbox"/> <b>Tris-HCl</b><br>(1 M, pH 7.0)                                      | -                   | Manufacturer's recommendations.   | Ambient |
| <input type="checkbox"/> <b>Slide Seals</b>                                                    | 3000279             | See Tip & Best Practices.         | Ambient |

### 3.1 Second Strand Synthesis

- a. At the end of step 2.2f, after the Thermocycler Adaptor has equilibrated to 4°C, remove the Slide Cassette from the thermal cycler and place on a flat, clean work surface.
- b. Leave the Thermocycler Adaptor on the thermal cycler. Prepare the thermal cycler with the following incubation protocol and start the program.

| Lid Temperature | Reaction Volume | Run Time |
|-----------------|-----------------|----------|
| 65°C            | -               | 15 min   |

  

| Step                    | Temperature | Time     |
|-------------------------|-------------|----------|
| Pre-equilibrate         | 65°C        | Hold     |
| Second Strand Synthesis | 65°C        | 00:15:00 |
| Hold                    | 4°C         | -        |

- c. Remove RT Master Mix from the wells.
-  d. Add 75 µl 0.08 M KOH (diluted from stock; ensure accurate dilution) to each well.
- e. Incubate 5 min at room temperature.
- f. Using a pipette, remove KOH from the wells.
- g. Add 100 µl EB to each well.
- h. Prepare Second Strand Mix on ice. Vortex and centrifuge briefly.

| Second Strand Mix<br><i>Add reagents in the order listed</i> | PN                  | Volume/slide +<br>10% (µl) | Volume/2 slides +<br>10% (µl) |
|--------------------------------------------------------------|---------------------|----------------------------|-------------------------------|
| ● Second Strand Reagent                                      | 2000219             | 305.8                      | 611.6                         |
| ● Second Strand Primer                                       | 2000217             | 17.6                       | 35.2                          |
| ● Second Strand Enzyme                                       | 2000218/<br>2000183 | 6.6                        | 13.2                          |
| <b>Total</b>                                                 | -                   | <b>330</b>                 | <b>660</b>                    |

- i. Using a pipette, remove Buffer EB from the wells.
- j. Add 75 µl Second Strand Mix to each well.
- k. Apply Slide Seal on the Slide Cassette and place on the Thermocycler Adaptor on the pre-heated thermal cycler. Close the thermal cycler lid.
- l. Skip Pre-equilibrate step to initiate Second Strand Synthesis.

### 3.2 Denaturation

- a. At the end of incubation, using a pipette, remove reagents from the wells.
- b. Add **100  $\mu$ l** Buffer EB to each well.
- c. Using a pipette, remove Buffer EB from the wells.

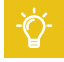

- d. Add **35  $\mu$ l** 0.08 M KOH (diluted from stock) to each well.
- e. Incubate **10 min** at **room temperature**.

f. Add **5  $\mu$ l** Tris-HCl (1 M, pH 7.0) to 4 tubes in an 8-tube strip (4 tubes will be used for each slide).

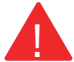

g. Transfer **35  $\mu$ l** sample from each well to a corresponding tube containing Tris-HCl in the 8-tube strip.

**DO NOT** discard sample. ~1-2  $\mu$ l volume variation is expected.

h. Vortex, centrifuge briefly, and place on ice.

The Slide Cassette and slide may be discarded.

# Step 4

## cDNA Amplification & QC

- 4.1 Cycle Number Determination – qPCR
- 4.2 cDNA Amplification
- 4.3 cDNA Cleanup – SPRIselect
- 4.4 cDNA QC & Quantification

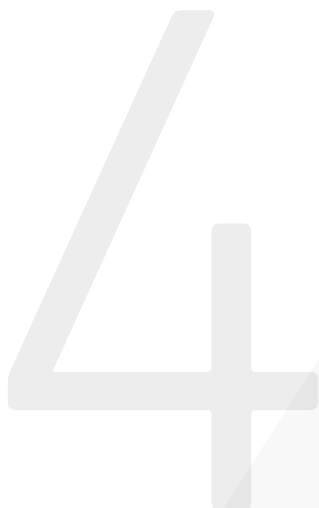

## 4.0 cDNA Amplification & QC

| CHECKLIST – GET STARTED!                                                                      |                     |                                   |         |
|-----------------------------------------------------------------------------------------------|---------------------|-----------------------------------|---------|
| Item                                                                                          | 10x PN              | Preparation & Handling            | Storage |
| <b>Equilibrate to room temperature</b>                                                        |                     |                                   |         |
| <input type="checkbox"/> ● cDNA Primers                                                       | 2000089             | Thaw, vortex, centrifuge briefly. | -20°C   |
| <input type="checkbox"/> Beckman Coulter<br>SPRIselect Reagent                                | -                   | Manufacturer's recommendations.   | -       |
| <input type="checkbox"/> Agilent TapeStation<br>Screen Tape and<br>Reagents<br>If used for QC | -                   | Manufacturer's recommendations.   | -       |
| <input type="checkbox"/> Agilent Bioanalyzer<br>High Sensitivity kit<br>If used for QC        | -                   | Manufacturer's recommendations.   | -       |
| <input type="checkbox"/> DNA High Sensitivity<br>Reagent Kit<br>If LabChip used for QC        | -                   | Manufacturer's recommendations.   | -       |
| <b>Place on ice</b>                                                                           |                     |                                   |         |
| <input type="checkbox"/> KAPA SYBR FAST<br>qPCR Master Mix<br>Minimize light exposure         | -                   | Vortex, centrifuge briefly.       | -20°C   |
| <input type="checkbox"/> ○ Amp Mix                                                            | 2000047/<br>2000103 | Vortex, centrifuge briefly.       | -20°C   |
| <b>Obtain</b>                                                                                 |                     |                                   |         |
| <input type="checkbox"/> Qiagen Buffer EB                                                     | -                   | -                                 | Ambient |
| <input type="checkbox"/> Nuclease-free Water                                                  | -                   | -                                 | -       |
| <input type="checkbox"/> qPCR Plate                                                           | -                   | -                                 | -       |
| <input type="checkbox"/> 10x Magnetic Separator                                               | 230003              | See Tips & Best Practices.        | Ambient |
| <input type="checkbox"/> Prepare 80% Ethanol<br>Prepare 15 ml for 4<br>reactions (1 slide)    | -                   | Prepare fresh.                    | Ambient |
| <b>Special Equipment</b>                                                                      |                     |                                   |         |
| <input type="checkbox"/> Real Time qPCR System                                                |                     |                                   |         |

4.1  
Cycle Number  
Determination – qPCR

a. Prepare qPCR Mix on ice. Vortex and centrifuge briefly.

| qPCR Mix<br><i>Add reagents in the order listed.<br/>Maintain on ice</i> | PN      | 5X* +<br>10% (µl)            | 9X* +<br>10% (µl) |
|--------------------------------------------------------------------------|---------|------------------------------|-------------------|
|                                                                          |         | *Includes 1 negative control |                   |
| Nuclease-free Water                                                      | -       | 20.4                         | 36.7              |
| KAPA SYBR FAST<br>qPCR Master Mix<br><i>Minimize light exposure</i>      | -       | 27.5                         | 49.5              |
| ● cDNA Primers                                                           | 2000089 | 1.7                          | 3.1               |
| <b>Total</b>                                                             | -       | <b>49.6</b>                  | <b>89.3</b>       |

b. Add 9 µl qPCR Mix to each well in a qPCR plate (a well for negative control may be included).

c. Transfer 1 µl sample from step 3.2h to the qPCR plate well containing the qPCR Mix. Pipette mix, centrifuge briefly (if using a negative control, add 1 µl nuclease-free water to the corresponding well).

d. Prepare a qPCR system with the following protocol, place the plate, and start the program.

| Lid Temperature | Reaction Volume | Run Time |
|-----------------|-----------------|----------|
| -               | 10 µl           | 35 min   |

  

| Step | Temperature                            | Time     |
|------|----------------------------------------|----------|
| 1    | 98°C                                   | 00:03:00 |
| 2    | 98°C                                   | 00:00:05 |
| 3    | 63°C                                   | 00:00:30 |
| 4    | Record amplification signal            |          |
| 5    | Go to step 2, for a total of 25 cycles |          |

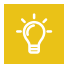

e. Record the Cq Value for each sample.

The threshold for determining the Cq Value should be set along the exponential phase of the amplification plot, at ~25% of the peak fluorescence value.

Representative qPCR Amplification Plots

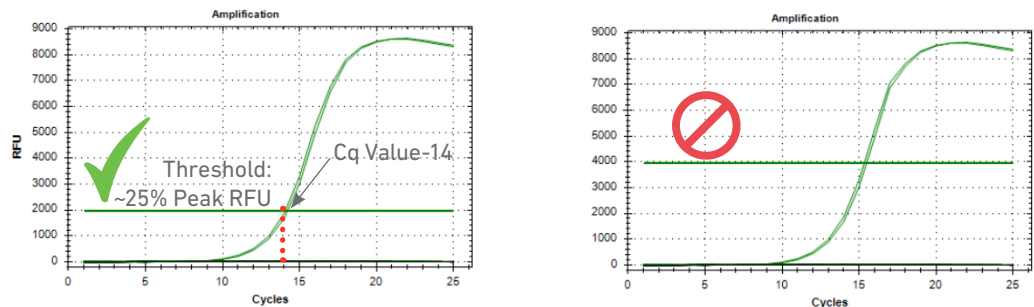



## 4.2 cDNA Amplification

a. Prepare cDNA Amplification Mix on ice. Vortex and centrifuge briefly.

| cDNA Amplification Mix<br><i>Add reagents in the order listed</i> | PN                  | 4X +<br>10% (µl) | 8X +<br>10% (µl) |
|-------------------------------------------------------------------|---------------------|------------------|------------------|
| ○ Amp Mix                                                         | 2000047/<br>2000103 | 220              | 440              |
| ● cDNA Primers                                                    | 2000089             | 66               | 132              |
| <b>Total</b>                                                      | -                   | <b>286</b>       | <b>572</b>       |

b. Add **65 µl** cDNA Amplification Mix to remaining **~35 µl** sample from step 3.2h.

c. Pipette mix 15x (pipette set to 90 µl). Centrifuge briefly.

d. Incubate in a thermal cycler with the following protocol.

| Lid Temperature | Reaction Volume | Run Time   |
|-----------------|-----------------|------------|
| 105°C           | 100 µl          | ~45-60 min |

  

| Step | Temperature                                                                                               | Time     |
|------|-----------------------------------------------------------------------------------------------------------|----------|
| 1    | 98°C                                                                                                      | 00:03:00 |
| 2    | 98°C                                                                                                      | 00:00:15 |
| 3    | 63°C                                                                                                      | 00:00:20 |
| 4    | 72°C                                                                                                      | 00:01:00 |
| 5    | Go to Step 2, Use the Cq Value as the total # of cycles.<br>See table below for total # of cycle examples |          |
| 6    | 72°C                                                                                                      | 00:01:00 |
| 7    | 4°C                                                                                                       | Hold     |

Cycle number examples determined based on rounding the Cq Value.

| Cq Value from qPCR | Total Cycles |
|--------------------|--------------|
| 12.2               | 12 cycles    |
| 13.5               | 14 cycles    |
| 13.8               | 14 cycles    |

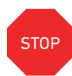

e. Store at **4°C** for up to **72 h** or at **-20°C** for up to **1 week**, or proceed to the next step.

### 4.3 cDNA Cleanup – SPRIselect

- a. Vortex to resuspend the SPRIselect reagent. Add **60 µl** SPRIselect reagent (**0.6X**) to each sample (100 µl) and pipette mix 15x (pipette set to 150 µl).
- b. Incubate **5 min** at **room temperature**.
- c. Place on the magnet•**High** until the solution clears.
- d. Remove the supernatant.
- e. Add **200 µl** 80% ethanol to the pellet. Wait **30 sec**.
- f. Remove the ethanol.
- g. **Repeat** steps e and f for a total of 2 washes.
- h. Centrifuge briefly and place on the magnet•**Low**.
- i. Remove any remaining ethanol. Air dry for **2 min**.  
DO NOT exceed **2 min** as this will decrease elution efficiency.
- j. Remove from the magnet. Add **40.5 µl** Buffer EB. Pipette mix 15x (pipette set to 40 µl).
- k. Incubate **2 min** at **room temperature**.
- l. Place the tube strip on the magnet•**Low** until the solution clears.
- m. Transfer **40 µl** sample to a new tube strip.
- n. Store at **4°C** for up to **72 h** or at **-20°C** for up to **4 weeks**, or proceed to the next step.

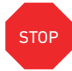

4.4  
cDNA QC & Quantification

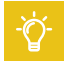

- a. Run 1 µl of sample on an Agilent Bioanalyzer High Sensitivity chip. cDNA profile may vary depending on tissue type and quality. Lower molecular weight product (35-150 bp) may be present. This is normal and does not affect sequencing or application performance.

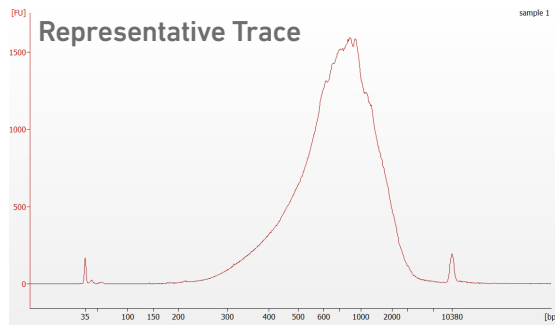

EXAMPLE CALCULATION

i. **Select Region**

Under the “Electropherogram” view choose the “Region Table”. Manually select the region of ~200 – ~9000 bp.

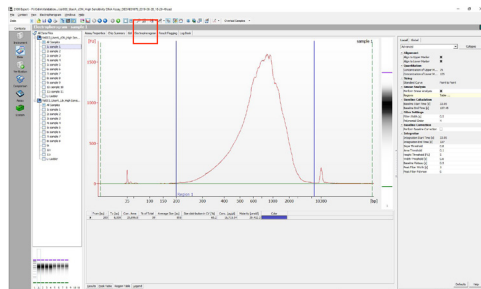

ii. **Note Concentration [pg/µl]**

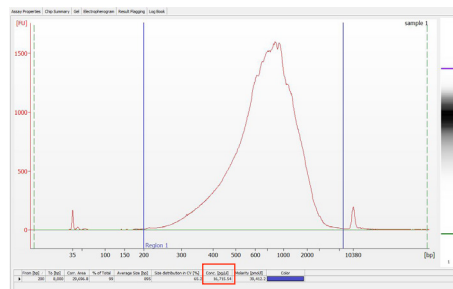

iii. **Calculate**

Multiply the cDNA concentration [pg/µl] reported via the Agilent 2100 Expert Software by the elution volume (40 µl) of the Post cDNA Amplification Reaction Clean Up sample and then divide by 1,000 to obtain the total cDNA yield in ng.

**Example Calculation of cDNA Total Yield**

Concentration: 16,715.54 pg/µl  
Elution Volume: 40

$$\begin{aligned} \text{Total cDNA Yield} &= \frac{\text{Conc'n (pg/}\mu\text{l)} \times \text{Elution Volume (}\mu\text{l)}}{1000 \text{ (pg/ng)}} \\ &= \frac{16,715.54 \text{ (pg/}\mu\text{l)} \times 40 \text{ (}\mu\text{l)}}{1000 \text{ (pg/ng)}} = 668.6 \text{ ng} \end{aligned}$$

The carry forward cDNA volume is specified in step 5.1.  
Refer to step 5.5e for appropriate number of Sample Index PCR cycles based on carry forward cDNA/input mass.

**Alternate Quantification Methods:**

- Agilent TapeStation
- LabChip

[See Appendix for representative traces](#)

# Step 5

## Spatial Gene Expression Library Construction

- 5.1 Fragmentation, End Repair & A-tailing
- 5.2 Post Fragmentation, End Repair & A-tailing Double Sided Size Selection – SPRIselect
- 5.3 Adaptor Ligation
- 5.4 Post Ligation Cleanup – SPRIselect
- 5.5 Sample Index PCR
- 5.6 Post Sample Index PCR Double Sided Size Selection – SPRIselect
- 5.7 Post Library Construction QC

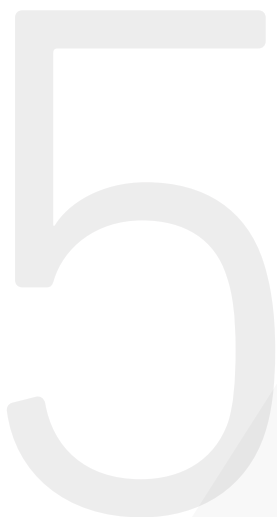

## 5.0 Visium Spatial Gene Expression Library Construction

| CHECKLIST – GET STARTED!                                                                           |                     |                                                    |         |
|----------------------------------------------------------------------------------------------------|---------------------|----------------------------------------------------|---------|
| Item                                                                                               | 10x PN              | Preparation & Handling                             | Storage |
| <b>Equilibrate to room temperature</b>                                                             |                     |                                                    |         |
| <input type="checkbox"/> ● <b>Fragmentation Buffer</b>                                             | 2000091             | Vortex, verify no precipitate, centrifuge briefly. | -20°C   |
| <input type="checkbox"/> ● <b>Adaptor Oligos</b>                                                   | 2000094             | Vortex, centrifuge briefly.                        | -20°C   |
| <input type="checkbox"/> ● <b>Ligation Buffer</b>                                                  | 2000092             | Vortex, verify no precipitate, centrifuge briefly. | -20°C   |
| <input type="checkbox"/> <b>Dual Index Plate TT Set A</b>                                          | 3000431             | -                                                  | -20°C   |
| <input type="checkbox"/> <b>Beckman Coulter<br/>SPRIselect Reagent</b>                             | -                   | Manufacturer's recommendations.                    | -       |
| <input type="checkbox"/> <b>Agilent TapeStation<br/>Screen Tape and Reagents</b><br>If used for QC |                     | Manufacturer's recommendations.                    | -       |
| <input type="checkbox"/> <b>Agilent Bioanalyzer High<br/>Sensitivity kit</b><br>If used for QC     | -                   | Manufacturer's recommendations.                    | -       |
| <input type="checkbox"/> <b>DNA High Sensitivity<br/>Reagent Kit</b><br>If LabChip used for QC     | -                   | Manufacturer's recommendations.                    | -       |
| <b>Place on ice</b>                                                                                |                     |                                                    |         |
| <input type="checkbox"/> ● <b>Fragmentation Enzyme</b>                                             | 2000090/<br>2000104 | Pipette mix, centrifuge briefly before using.      | -20°C   |
| <input type="checkbox"/> ● <b>DNA Ligase</b>                                                       | 220110/<br>220131   | Pipette mix, centrifuge briefly before using.      | -20°C   |
| <input type="checkbox"/> ○ <b>Amp Mix</b>                                                          | 2000047/<br>2000103 | Vortex, centrifuge briefly.                        | -20°C   |
| <input type="checkbox"/> <b>KAPA Library<br/>Quantification Kit<br/>for Illumina Platforms</b>     | -                   | Manufacturer's recommendations.                    | -       |
| <b>Obtain</b>                                                                                      |                     |                                                    |         |
| <input type="checkbox"/> <b>Qiagen Buffer EB</b>                                                   | -                   |                                                    | Ambient |
| <input type="checkbox"/> <b>10x Magnetic Separator</b>                                             | 230003              | See Tips & Best Practices.                         | Ambient |
| <input type="checkbox"/> <b>Prepare 80% Ethanol</b><br>Prepare 20 ml for 8 reactions               | -                   | Prepare fresh.                                     | Ambient |

### Step Overview (Step 5.1d)

#### Correlation between input & library complexity

A Visium Spatial Gene Expression library is generated using a fixed proportion (10  $\mu$ l, 25%) of the total cDNA (40  $\mu$ l) obtained at step 4.3. The complexity of this library will be comparable to one generated using a higher proportion (>25%) of the cDNA. The remaining proportion (30  $\mu$ l, 75%) of the cDNA may be stored at 4°C for up to 72 h or at -20°C for longer-term storage (up to 4 weeks).

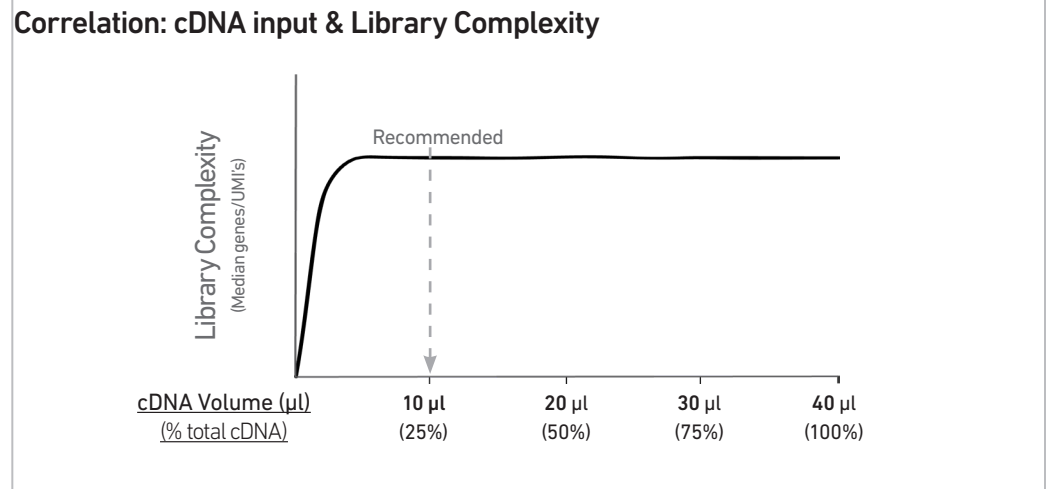

Note that irrespective of the total cDNA yield (ng), which may vary based on tissue type, coverage of Capture Area by tissue section, and tissue thickness, this protocol has been optimized for a broad range of input mass (ng), as shown in the example below. The total number of SI PCR cycles (step 5.5d) should be optimized based on carrying forward a fixed proportion (10  $\mu$ l, 25%) of the total cDNA yield calculated during Post cDNA Amplification QC & Quantification (step 4.4).

**Example: Library Construction Input Mass & SI PCR Cycles**

| Tissue Type      | Tissue Covered Capture Area (%)                                                         | Total cDNA Amplification Cycles | Total cDNA Yield (ng) | cDNA Input into Fragmentation |           | SI PCR Cycle Number |
|------------------|-----------------------------------------------------------------------------------------|---------------------------------|-----------------------|-------------------------------|-----------|---------------------|
|                  |                                                                                         |                                 |                       | Volume ( $\mu$ l)             | Mass (ng) |                     |
| High RNA Content | 10%  | 17                              | 412                   | 10                            | 102       | 13                  |
|                  | 60%  | 15                              | 928                   | 10                            | 232       | 10                  |
| Low RNA Content  | 10%  | 17                              | 128                   | 10                            | 32        | 14                  |
|                  | 75%  | 15                              | 536                   | 10                            | 134       | 12                  |

## 5.1 Fragmentation, End Repair & A-tailing

- a. Prepare a thermal cycler with the following incubation protocol and start the program.

| Lid Temperature | Reaction Volume | Run Time |
|-----------------|-----------------|----------|
| 65°C            | 50 µl           | ~35 min  |

  

| Step                                                                             | Temperature | Time     |
|----------------------------------------------------------------------------------|-------------|----------|
| Pre-cool block<br><i>Pre-cool block prior to preparing the Fragmentation Mix</i> | 4°C         | Hold     |
| Fragmentation                                                                    | 32°C        | 00:05:00 |
| End Repair & A-tailing                                                           | 65°C        | 00:30:00 |
| Hold                                                                             | 4°C         | -        |

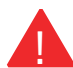

- b. Prepare Fragmentation Mix on ice. Pipette mix and centrifuge briefly.

| Fragmentation Mix<br><i>Add reagents in the order listed</i> | PN      | 4X +<br>10% (µl) | 8X +<br>10% (µl) |
|--------------------------------------------------------------|---------|------------------|------------------|
| ● Fragmentation Buffer                                       | 2000091 | 22               | 44               |
| ● Fragmentation Enzyme                                       | 2000090 | 44               | 88               |
| <b>Total</b>                                                 | -       | <b>66</b>        | <b>132</b>       |

- c. Transfer **ONLY 10 µl** purified cDNA sample from cDNA Cleanup (step 4.3m) to a tube strip maintained on ice.  
Note that only **10 µl** (25%) cDNA sample is sufficient for generating Visium Spatial Gene Expression library. The remaining **30 µl** (75%) cDNA sample can be stored at **4°C** for up to **72 h** or at **-20°C** for up to **4 weeks** for generating additional libraries.
- d. Add **25 µl** Buffer EB to each sample.
- e. Add **15 µl** Fragmentation Mix to each sample.
- f. Pipette mix 15x (pipette set to 35 µl) on ice. Centrifuge briefly.
- g. Transfer into the pre-cooled thermal cycler (**4°C**).
- h. Skip Pre-cool block step to initiate Fragmentation.

5.2  
Post Fragmentation,  
End Repair & A-tailing  
Double Sided Size  
Selection – SPRIselect

- a. Vortex to resuspend SPRIselect reagent. Add **30  $\mu$ l** SPRIselect (**0.6X**) reagent to each sample. Pipette mix 15x (pipette set to 75  $\mu$ l).
- b. Incubate **5 min** at **room temperature**.
- c. Place on the magnet•**High** until the solution clears. **DO NOT** discard supernatant.

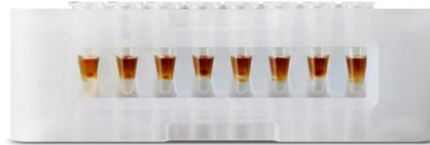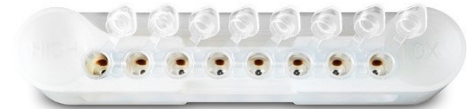

- d. Transfer **75  $\mu$ l** supernatant to a new tube strip.
- e. Vortex to resuspend SPRIselect reagent. Add **10  $\mu$ l** SPRIselect reagent (**0.8X**) to each sample. Pipette mix 15x (pipette set to 80  $\mu$ l).
- f. Incubate **5 min** at **room temperature**.
- g. Place on the magnet•**High** until the solution clears.

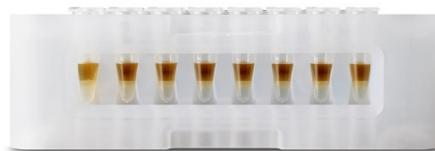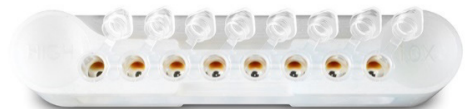

- h. Remove **80  $\mu$ l** supernatant. **DO NOT** discard any beads.
- i. Add **125  $\mu$ l** 80% ethanol to the pellet. Wait **30 sec**.
- j. Remove the ethanol.
- k. **Repeat** steps i and j for a total of 2 washes.
- l. Centrifuge briefly. Place on the magnet•**Low** until the solution clears. Remove remaining ethanol. **DO NOT** over dry to ensure maximum elution efficiency.
- m. Remove from the magnet. Add **50.5  $\mu$ l** Buffer EB to each sample. Pipette mix 15x.
- n. Incubate **2 min** at **room temperature**.
- o. Place on the magnet•**High** until the solution clears.
- p. Transfer **50  $\mu$ l** sample to a new tube strip.



### 5.3 Adaptor Ligation

a. Prepare Adaptor Ligation Mix. Pipette mix and centrifuge briefly.

| Adaptor Ligation Mix<br><i>Add reagents in the order listed</i> | PN                | 4X +<br>10% (µl) | 8X +<br>10% (µl) |
|-----------------------------------------------------------------|-------------------|------------------|------------------|
| ● Ligation Buffer                                               | 2000092           | 88               | 176              |
| ● DNA Ligase                                                    | 220110/<br>220131 | 44               | 88               |
| ● Adaptor Oligos                                                | 2000094           | 88               | 176              |
| <b>Total</b>                                                    | -                 | <b>220</b>       | <b>440</b>       |

b. Add 50 µl Adaptor Ligation Mix to 50 µl sample. Pipette mix 15x (pipette set to 90 µl). Centrifuge briefly.

c. Incubate in a thermal cycler with the following protocol.

| Lid Temperature | Reaction Volume | Run Time |
|-----------------|-----------------|----------|
| 30°C            | 100 µl          | 15 min   |
| Step            | Temperature     | Time     |
| 1               | 20°C            | 00:15:00 |
| 2               | 4°C             | Hold     |

#### 5.4 Post Ligation Cleanup – SPRIselect

- a. Vortex to resuspend SPRIselect Reagent. Add **80 µl** SPRIselect Reagent (**0.8X**) to each sample. Pipette mix 15x (pipette set to 150 µl).
- b. Incubate **5 min** at **room temperature**.
- c. Place on the magnet•**High** until the solution clears.
- d. Remove the supernatant.
- e. Add **200 µl** 80% ethanol to the pellet. Wait **30 sec**.
- f. Remove the ethanol.
- g. **Repeat** steps e and f for a total of 2 washes.
- h. Centrifuge briefly. Place on the magnet•**Low**.
- i. Remove any remaining ethanol. Air dry for **2 min**. **DO NOT** exceed **2 min** as this will decrease elution efficiency.
- j. Remove from the magnet. Add **30.5 µl** Buffer EB. Pipette mix 15x.
- k. Incubate **2 min** at **room temperature**.
- l. Place on the magnet•**Low** until the solution clears.
- m. Transfer **30 µl** sample to a new tube strip.

## 5.5 Sample Index PCR

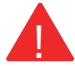

- Choose the appropriate sample index sets to ensure that no sample indices overlap in a multiplexed sequencing run. Record the 10x Sample Index name (PN-1000215 Dual Index Plate TT Set A well ID) used.
- Add **50 µl** Amp Mix (PN-2000047 or 2000103) to **30 µl** sample.
- Add **20 µl** of an individual Dual Index TT Set A to each well and record the well ID used. Pipette mix 5x (pipette set to 90 µl). Centrifuge briefly.
- Incubate in a thermal cycler with the following protocol.

| Lid Temperature | Reaction Volume                         | Run Time   |
|-----------------|-----------------------------------------|------------|
| 105°C           | 100 µl                                  | ~25-40 min |
| Step            | Temperature                             | Time       |
| 1               | 98°C                                    | 00:00:45   |
| 2               | 98°C                                    | 00:00:20   |
| 3               | 54°C                                    | 00:00:30   |
| 4               | 72°C                                    | 00:00:20   |
| 5               | Go to step 2, see below for # of cycles |            |
| 6               | 72°C                                    | 00:01:00   |
| 7               | 4°C                                     | Hold       |

### Recommended cycle numbers

| cDNA Input     | Total Cycles |
|----------------|--------------|
| 0.25-25 ng     | 14-16        |
| 25-150 ng      | 12-14        |
| 150-500 ng     | 10-12        |
| 500-1,000 ng   | 8-10         |
| 1,000-1,500 ng | 6-8          |
| >1500 ng       | 5            |

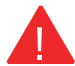

The total cycles should be optimized based on 25% carry forward cDNA yield/input calculated during Post cDNA Amplification QC & Quantification (step 4.4)

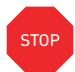

- Store at **4°C** for up to **72 h** or proceed to the next step.

5.6  
Post Sample Index  
PCR Double Sided Size  
Selection – SPRIselect

- a. Vortex to resuspend the SPRIselect reagent. Add **60 µl** SPRIselect Reagent (**0.6X**) to each sample. Pipette mix 15x (pipette set to 150 µl).
- b. Incubate **5 min** at **room temperature**.
- c. Place on the magnet•**High** until the solution clears. **DO NOT** discard supernatant.
- d. Transfer **150 µl** supernatant to a new tube strip.
- e. Vortex to resuspend the SPRIselect reagent. Add **20 µl** SPRIselect Reagent (**0.8X**) to each sample. Pipette mix 15x (pipette set to 150 µl).
- f. Incubate **5 min** at **room temperature**.
- g. Place the magnet•**High** until the solution clears.
- h. Remove **165 µl** supernatant. **DO NOT** discard any beads.
- i. With the tube still in the magnet, add **200 µl** 80% ethanol to the pellet. Wait **30 sec**.
- j. Remove the ethanol.
- k. **Repeat** steps i and j for a total of 2 washes.
- l. Centrifuge briefly. Place on the magnet•**Low**. Remove remaining ethanol.
- m. Remove from the magnet. Add **35.5 µl** Buffer EB. Pipette mix 15x.
- n. Incubate **2 min** at **room temperature**.
- o. Place on the magnet•**Low** until the solution clears.
- p. Transfer **35 µl** to a new tube strip.
- q. Store at **4°C** for up to **72 h** or at **-20°C** for **long-term** storage.

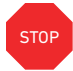

## 5.7 Post Library Construction QC

Run 1  $\mu\text{l}$  of sample (1:10 dilution) on an Agilent Bioanalyzer High Sensitivity chip.

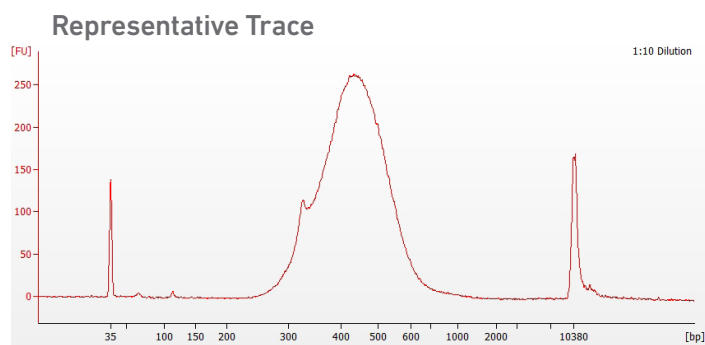

A smaller peak (~200-600 bp) may be present in some tissue types (e.g. mouse brain).

Determine the average fragment size from the Bioanalyzer trace. This will be used as the insert size for library quantification.

### Alternate QC Method:

- Agilent TapeStation
- LabChip

[See Appendix for representative traces](#)

[See Appendix for Post Library Construction Quantification](#)

# Sequencing

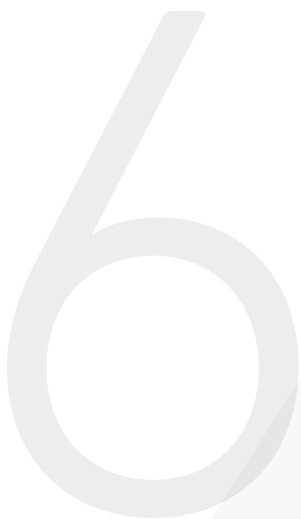

Sequencing Libraries

Visium Spatial Gene Expression libraries comprise standard Illumina paired-end constructs which begin with P5 and end with P7. 16 bp Spatial Barcodes are encoded at the start of TruSeq Read 1, while i7 and i5 sample index sequences are incorporated as the index read. TruSeq Read 1 and Read 2 are standard Illumina sequencing primer sites used in paired-end sequencing. TruSeq Read 1 is used to sequence 16 bp Spatial Barcodes and 12 bp UMI. Sequencing these libraries produce a standard Illumina BCL data output folder.

Visium Spatial Gene Expression Library

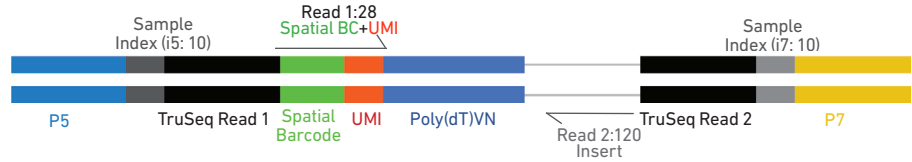

Sequencing Depth

|                                |                                                                   |
|--------------------------------|-------------------------------------------------------------------|
| <b>Sequencing Depth/spot</b>   | Minimum 50,000 read pairs per tissue covered spot on Capture Area |
| <b>Sequencing Depth/sample</b> | See example calculation below                                     |

**Example: Sequencing Depth for a Sample**

- Estimate the approximate Capture Area (%) covered by the tissue section.
- **Calculate total sequencing depth=**  
(Coverage Area x total spots on the Capture Area) x 50,000 read pairs/spot
- **Example calculation for 60% coverage:**  
(0.60 x 5,000 total spots) x 50,000 read pairs/spot= 150 million total read pairs for that sample

Estimated Coverage Area (%) Examples

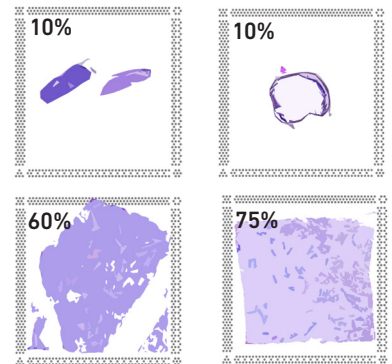

Sequencing Type & Run Parameters

Use the sequencing run type and parameters indicated.

**Dual Index Library**

Paired-end, dual indexed sequencing

- Read 1: 28 cycles
- i7 Index: 10 cycles
- i5 Index: 10 cycles
- Read 2: 120 cycles

## ILLUMINA SEQUENCER COMPATIBILITY

The compatibility of the listed sequencers has been verified by 10x Genomics. Some variation in assay performance is expected based on sequencer choice. For more information about performance variation, visit the 10x Genomics Support website.

- MiSeq
- NextSeq 500/550\*
- HiSeq 2500 (Rapid Run)
- HiSeq 3000/4000
- NovaSeq
- iSeq

\*Sequencing Visium Spatial Gene Expression libraries on the NextSeq 500/550 platform may yield reduced sequence quality and sensitivity relative to the MiSeq, HiSeq, and NovaSeq platforms. Refer to the 10x Genomics Support website for more information.

## SAMPLE INDICES

Each well of the Dual Index Kit TT Set A (PN-1000215) contains a mix of one unique i7 and one unique i5 sample index. If multiple samples are pooled in a sequence lane, the sample index name (i.e. the Dual Index TT Set A plate well ID, SI-TT-) is needed in the sample sheet used for generating FASTQs with “spaceranger mkfastq”. Samples utilizing the same sample index should not be pooled together or run on the same flow cell lane, as this would not enable correct sample demultiplexing.

## LIBRARY LOADING

Once quantified and normalized, the Visium Spatial Gene Expression libraries should be denatured and diluted as recommended for Illumina sequencing platforms. Refer to Illumina documentation for denaturing and diluting libraries. Refer to the 10x Genomics Support website, for more information.

| Instrument      | Loading Concentration (pM) | PhiX (%) |
|-----------------|----------------------------|----------|
| MiSeq           | 11                         | 1        |
| NextSeq 500/550 | 1.8                        | 1        |
| HiSeq 2500 (RR) | 11                         | 1        |
| HiSeq 4000      | 240                        | 1        |
| NovaSeq         | 150**/300                  | 1        |
| iSeq            | 150                        | 1        |

\*\* Use 150 pM loading concentration for Illumina XP workflow.

## LIBRARY POOLING

The Visium Spatial Gene Expression libraries may be pooled for sequencing, taking into account the differences in tissue covered spot on a Capture Area and per-spot read depth requirements between each library. Samples utilizing the same sample index should not be pooled together, or run on the same flow cell lane, as this would not enable correct sample demultiplexing.



# Troubleshooting

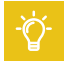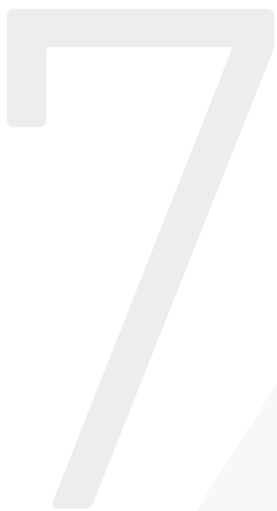

| STEP | NOTES |
|------|-------|
|------|-------|

Tissue Folding –  
Impact on UMI Count

Folded tissue

H&E stain

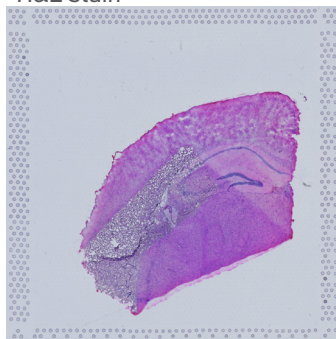

UMI count

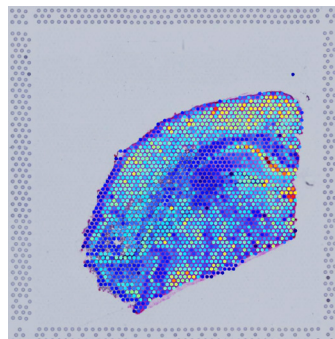

Folded tissue section can result in OCT induced tissue damage, impacting permeabilization, and diminishing assay sensitivity. However, the data derived from the rest of the tissue portions (not folded) can be analyzed.

Tissue Placement –  
Impact on UMI Count

Fiducials are obstructed

H&E stain

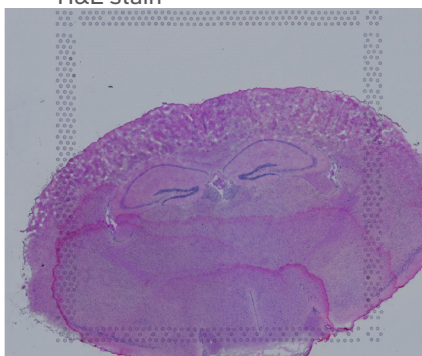

UMI Count

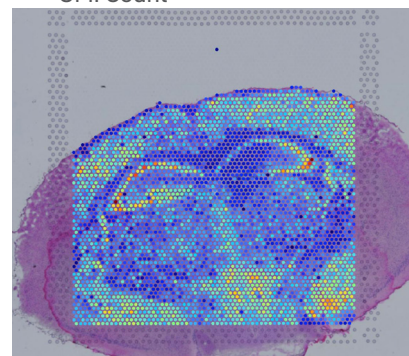

Fiducial obstruction may result in image analysis failure. Placement must be correct before the workflow begins. If necessary, software will prompt users to manually align tissue images during analysis.

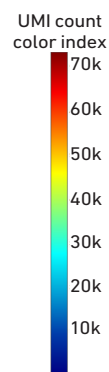

| STEP | CORRECT | INCORRECT |
|------|---------|-----------|
|------|---------|-----------|

1.2 Tissue Staining – Impact on UMI Count

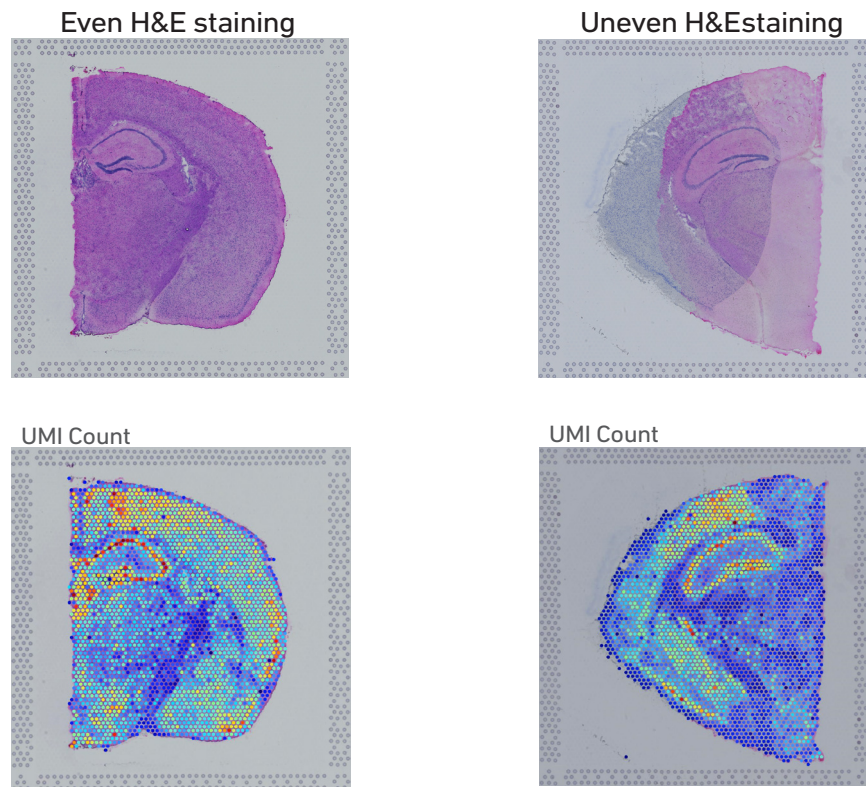

Ensure that staining reagents are applied to the tissue uniformly and adequate washes are performed. A gentle tap may help spread the reagent uniformly. Uneven staining may diminish sensitivity and spatial resolution. However, the data derived from the evenly stained tissue portions can be analyzed.

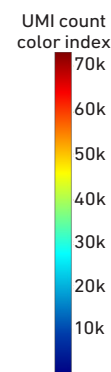

| STEP | CORRECT | INCORRECT |
|------|---------|-----------|
|------|---------|-----------|

2.1 Tissue Permeabilization – Reagent Coverage

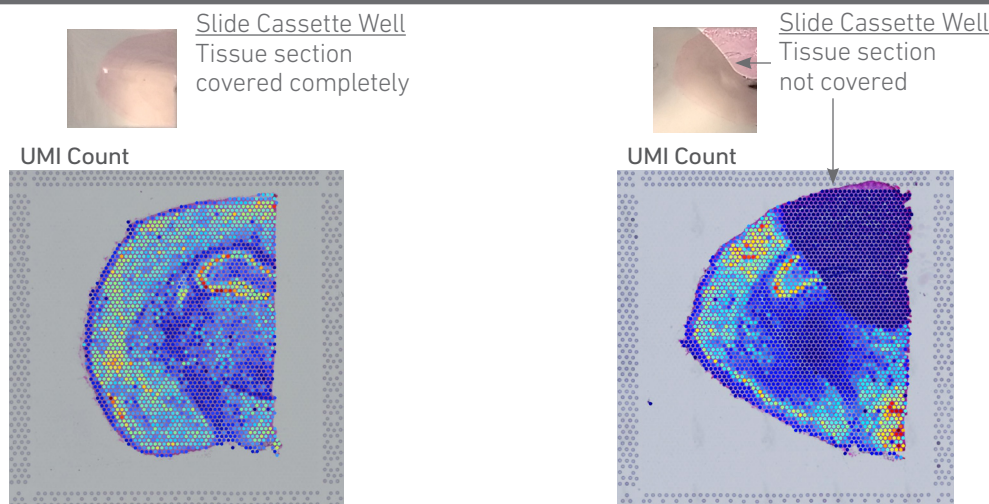

Ensure that permeabilization reagents are applied to the tissue uniformly. Uneven permeabilization will diminish sensitivity and spatial resolution. However, the data derived from the optimally permeabilized tissue portions can be

2.1 Tissue Permeabilization – Time

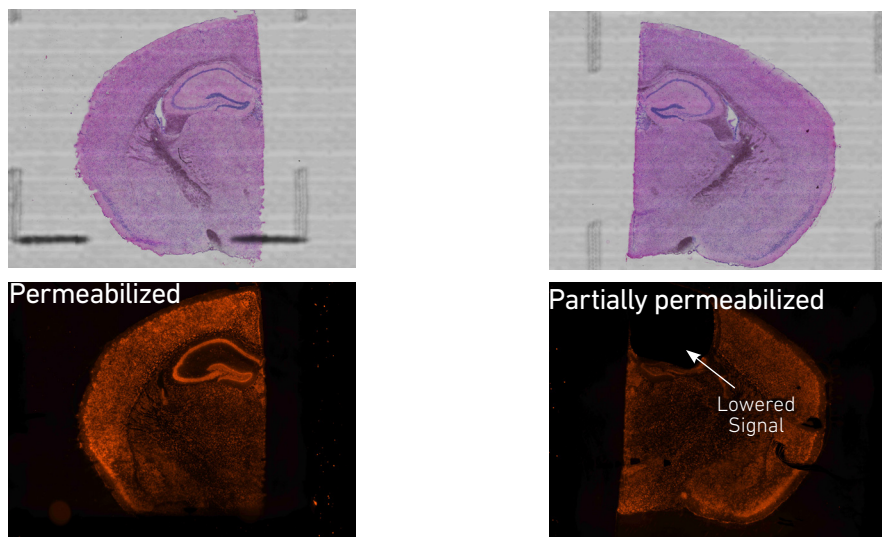

Ensure that permeabilization times are optimized for each tissue type using the Visium Spatial Tissue Optimization protocol prior to beginning this workflow. Sub-optimal permeabilization will diminish sensitivity and spatial resolution.

3.2 Denaturation – Partial

Cover the tissue section uniformly with 35 µl 0.08 M KOH to prevent partial denaturation.

4.1 No Cq Value

Ensure that correct KOH dilution (0.08 M) is used at step 3.2d. Also, confirm that the qPCR mix includes KAPA SYBR FAST dye.

4.4 Flat cDNA Trace (Cq value observed)

Flat cDNA trace, even though Cq value was observed at step 4.1. Failure to properly neutralize KOH by addition of Tris-HCl (1 M, pH 7.0) at step 3.2f negatively impacts cDNA amplification efficiency (no impact on qPCR amplification, hence Cq value is observed).

# Appendix

Post Library Construction Quantification

Agilent TapeStation Traces

LabChip Traces

Coverslip Application & Removal

Oligonucleotide Sequences

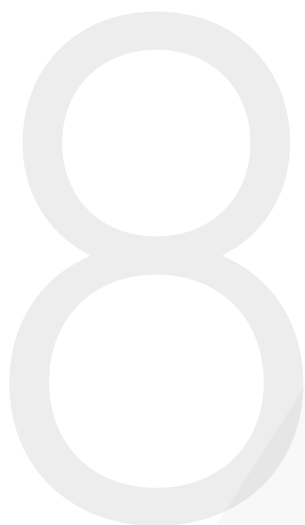

## Post Library Construction Quantification

- a. Thaw KAPA Library Quantification Kit for Illumina Platforms.
- b. Dilute **2 µl** sample with deionized water to appropriate dilutions that fall within the linear detection range of the KAPA Library Quantification Kit for Illumina Platforms. (For more accurate quantification, make the dilution(s) in duplicate).
- c. Make enough Quantification Master Mix for the DNA dilutions per sample and the DNA Standards (plus 10% excess) using the guidance for 1 reaction volume below.

| Quantification Master Mix     | 1X (µl)   |
|-------------------------------|-----------|
| SYBR Fast Master Mix + Primer | 12        |
| Water                         | 4         |
| <b>Total</b>                  | <b>16</b> |

- d. Dispense **16 µl** Quantification Master Mix for sample dilutions and DNA Standards into a 96 well PCR plate.
- e. Add **4 µl** sample dilutions and **4 µl** DNA Standards to appropriate wells. Centrifuge briefly.
- f. Incubate in a thermal cycler with the following protocol.

| Step | Temperature                         | Run Time |
|------|-------------------------------------|----------|
| 1    | 95°C                                | 00:03:00 |
| 2    | 95°C                                | 00:00:05 |
| 3    | 67°C                                | 00:00:30 |
| 4    | Go to Step 2, 29X (Total 30 cycles) |          |

- g. Follow the manufacturer's recommendations for qPCR-based quantification. For library quantification for sequencer clustering, determine the concentration based on insert size derived from the Bioanalyzer/TapeStation trace.

## Agilent TapeStation Traces

### Agilent TapeStation Traces

Agilent TapeStation High Sensitivity D5000 ScreenTape was used.

Protocol steps correspond to the Visium Spatial Gene Expression Reagent Kits User Guide (CG000239).

#### Protocol Step 4.4 – cDNA QC & Quantification

Run 2  $\mu$ l sample mixed with 2  $\mu$ l loading buffer. Ensure dilution factor is factored in when calculating cDNA yield/ $\mu$ l (divide by 2).

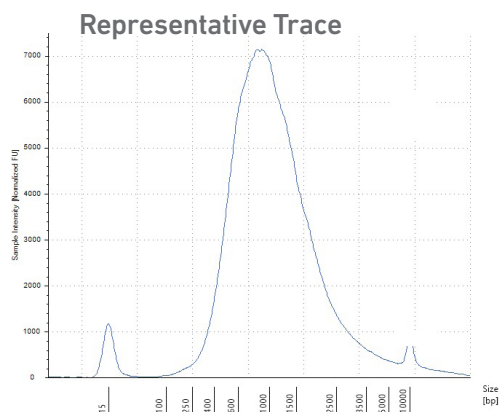

#### Protocol Step 5.7 – Post Library Construction QC

Run 2  $\mu$ l diluted sample (1:10 dilution) mixed with 2  $\mu$ l loading buffer.

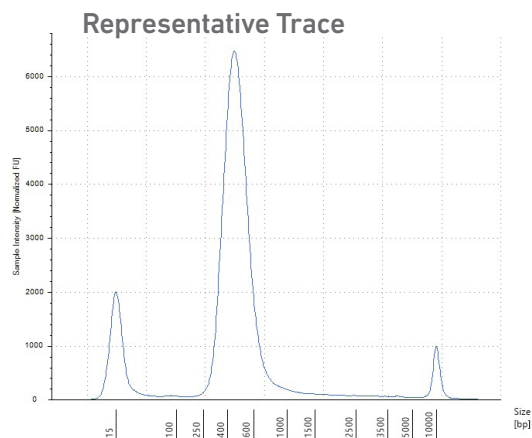

## LabChip Traces

### LabChip Traces

DNA High Sensitivity Reagent Kit was used.

Protocol steps correspond to the Visium Spatial Gene Expression Reagent Kits User Guide (CG000239).

#### Protocol Step 4.4 – cDNA QC & Quantification

##### Representative Trace

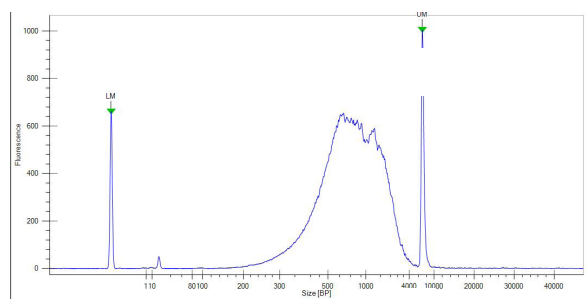

Run 10  $\mu$ l undiluted sample.  
cDNA yield calculation is same  
as Agilent Bioanalyzer traces.

#### Protocol Step 5.7 – Post Library Construction QC

##### Representative Trace

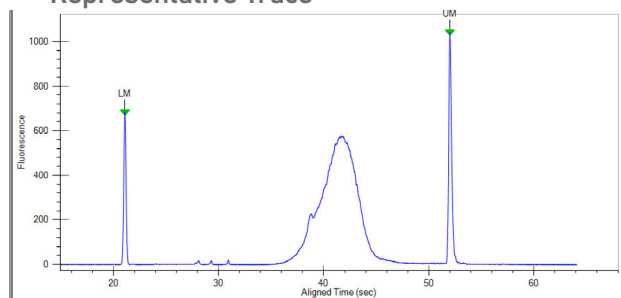

Run 10  $\mu$ l diluted sample (1:10 dilution).



## Coverslip Application & Removal

A coverslip may be mounted on the slides before imaging to enhance optical quality. Although imaging without a coverslip is sufficient to visualize the tissue morphology, some imaging systems require the use of coverslips.

If using a coverslip, follow this application and removal protocol to ensure that the tissue sections and the Capture Areas are not damaged.

### Items

- Large Coverslip** (Thermo Scientific 24 x 60 mm PN:22-050-233; Alternative, 24 x 50mm PN:22-050-232)
- Milli-Q water (800 ml)**
- 80% Ethanol (50 ml)**
- Laboratory Wipes**
- Thermocycler Adaptor** (pre-equilibrated to **37°C** on a thermal cycler; may be used for drying)
- Forceps**
- 85% Glycerol**  
(prepare **30 ml** – add **25.5 ml** 100% glycerol and **4.5 ml** Milli-Q water to a 50-ml centrifuge tube and vortex. Wait for the bubbles to dissipate or centrifuge at **300 rcf** for **1 min** before use)

### Application

Prior to mounting the coverslip, ensure that the sample and the slide with the tissue sections are dry. Moisture on the surface of the slide may dissolve the glycerol, resulting in faulty mounting.

If necessary, incubate the slide for **1 min** at **37°C** by placing on the pre-equilibrated Thermocycler Adaptor placed on a thermal cycler with the lid open.

- i. Add **200 µl** 85% glycerol to cover the tissue sections on the slide uniformly. If necessary, hold the slide at an angle for uniform coverage.
- ii. Apply the coverslip at an angle on one end of the slide. Slowly lower the coverslip, pressing down gently with forceps, without introducing bubbles.
- iii. Remove excess glycerol by placing one long edge of the slide on a laboratory wipe, and gently tilt the slide back and forth. Repeat with the second long edge of the slide. Repeat the process until the coverslip is secured.
- iv. After the coverslip is secured, **immediately** proceed with imaging. **DO NOT** let the glycerol attached coverslip dry. **DO NOT** use Cytoseal or nail polish for securing the coverslip.

### Cover uniformly with glycerol

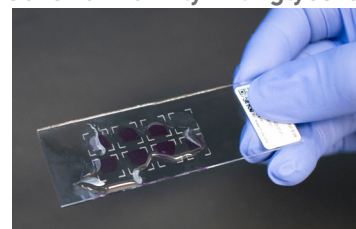

### Apply coverslip

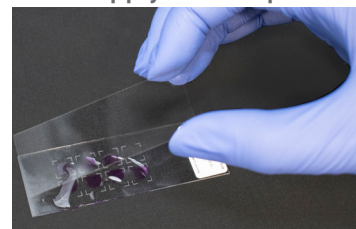

### Press down

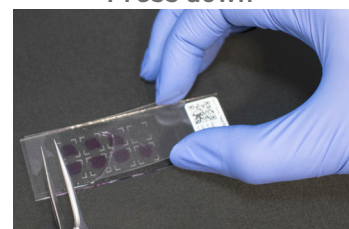

### Remove excess glycerol

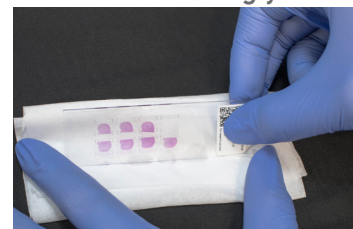

## Coverslip Application & Removal

### Removal

Remove the coverslip immediately after imaging is complete.

- i. Dispense **800 ml** Milli-Q water in a beaker and **50 ml** 80% ethanol in a 50-ml centrifuge tube.
- ii. Immerse the slide at  $\sim 45^\circ$  angle in the water with the coverslipped surface fully submerged and facing down.
- iii. Hold the slide in water until the coverslip slowly separates away from the slide. **DO NOT** move the slide up and down or shake forcibly to prevent damaging the tissue sections and the Capture Areas.
- iv. Once the coverslip is detached, remove slide and immerse the slide at  $\sim 90^\circ$  angle in the water 5x to remove any residual glycerol.
- v. Immerse the slide in 80% ethanol dispensed in the centrifuge tube.
- vi. Air dry slide at room temperature. If necessary, incubate the slide for **1 min** at **37°C** by placing on a pre-equilibrated Thermocycler Adaptor.

Proceed to the next workflow protocol step.

### Immerse in water

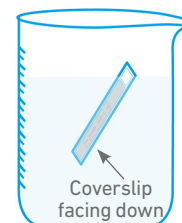

### Hold in water

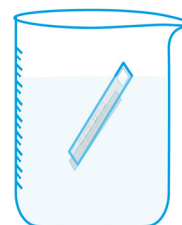

### Coverslip detaches

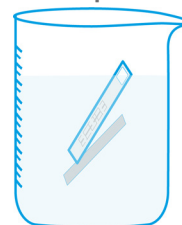

## Oligonucleotide Sequences

Protocol steps correspond to the Visium Spatial Gene Expression Reagent Kits User Guide (CG000239)

### Protocol Step 2.2 – Reverse Transcription

#### Slide Primers

5'-CTACACGACGCTCTCCGATCT-NNNNNNNNNNNNNNN-NNNNNNNNNNNN-TTTTTTTTTTTTTTTTTTTTTTTTTTTTTTTTTT-3'

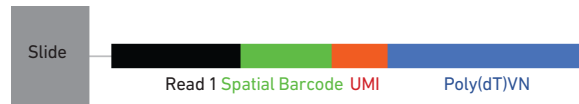

#### Template Switch Oligo PN -3000228

TSO  
5'-AAGCAGTGGTATCAACGCAGAGTACATrGrGrG-3'

#### cDNA

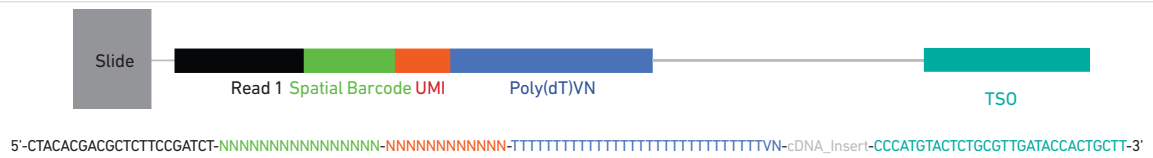

### Protocol Step 3.1 – Second Strand Synthesis

#### Second Strand Primer PN -2000217

Second Strand Primer  
5'-AAGCAGTGGTATCAACGCAGAG-3'

#### Second Strand

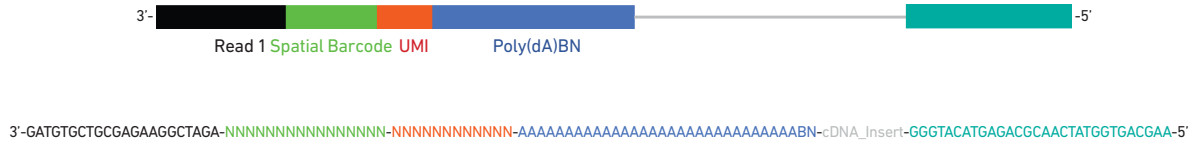

### Protocol Step 4.2 – cDNA Amplification

#### cDNA Primers PN-2000089

Forward Primer:   
Partial Read 1  
5'-CTACACGACGCTCTCCGATCT-3'

Reverse Primer:   
Partial TSO  
5'-AAGCAGTGGTATCAACGCAGAG-3'

#### Amplification Products

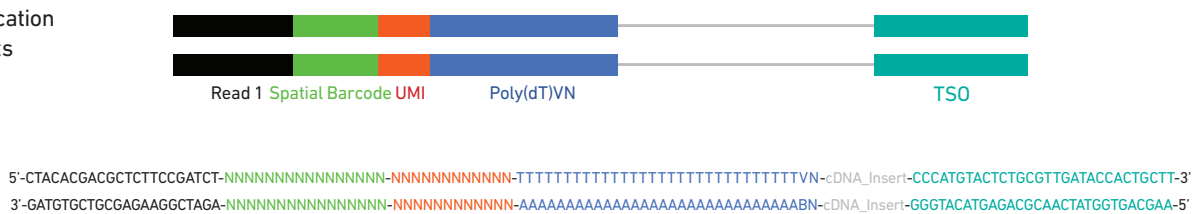

## Oligonucleotide Sequences

Protocol steps correspond to the [Visium Spatial Gene Expression Reagent Kits User Guide \(CG000239\)](#)

### Protocol Step 5.3 – Adaptor Ligation

Adaptor Oligos  
PN -200094

██████████

██████████

Partial Read 2

5'-GATCGGAAGAGCACACGTCTGAACTCCAGTCA-3'

3'-TCTAGCCTTCTCG-5'

Ligation  
Product

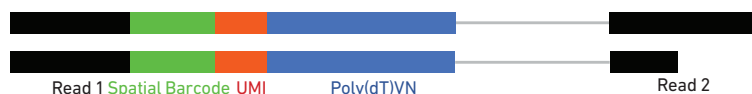

5'-CTACACGACGCTCTCCGATCT-NNNNNNNNNNNNNNNN-NNNNNNNNNNNN-TTTTTTTTTTTTTTTTTTTTTTTTTTTTTTTTTTTT-cDNA\_Insert-AGATCGGAAGAGC ACACGTCTGAACTCCAGTCA-3'  
3'-GATGTGCTGCGAGAAGGCTAGA-NNNNNNNNNNNNNNNN-NNNNNNNNNNNN-AAAAAAAAAAAAAAAAAAAAAAAAAAAAAAAAABN-cDNA\_Insert-TCTAGCCTTCTCG-5'

### Protocol Step 5.5 – Sample Index PCR

#### Dual Indexing

Dual Index TT  
Set A  
PN-1000215

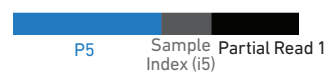

5'-AATGATACGGCGACCACCGAGATCT-NNNNNNNNNN-ACACTCTTTCCCTACACGACGCTC-3'

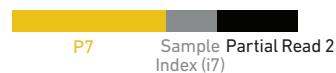

5'-CAAGCAGAAGACGGCATACGAGAT-NNNNNNNNNN-GTGACTGGAGTTCAGACGTGT-3'

Sample Index  
PCR Product

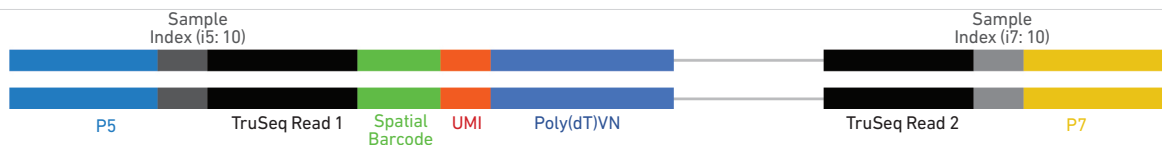

5'-AATGATACGGCGACCACCGAGATCT-NNNNNNNNNN-ACACTCTTTCCCTACACGACGCTCTCCGATCT-NNNNNNNNNN-NNNNNNNNNN-TTTTTTTTTTTTTTTTTTTTTTTTTTTTTTTTTTTT-cDNA\_Insert-AGATCGGAAGAGCACACGTCTGAACTCCAGTCA-NNNNNNNNNN-ATCTCGTATGCCGTCTTCTGCTTC-3'  
3'-TTACTATGCCCTGTGGCTCTAGA-NNNNNNNNNN-TGTGAGAAAGGATGTCTGCGAGAAGGCTAGA-NNNNNNNNNN-NNNNNNNNNN-AAAAAAAAAAAAAAAAAAAAAAAAAAAAAAAAABN-cDNA\_Insert-TCTAGCCTTCTGTGCGAGACTTGAGGTCAAGT-NNNNNNNNNN-TAGAGCATACGGCAGAAAGCAAC-5'
